# Supplementary material for: An efficient one-pot synthesis of industrially valuable primary organic carbamates and N-substituted ureas by a reusable Merrifield anchored iron(ii)-anthra catalyst [FeII(Anthra-Merf)] using urea as a sustainable carbonylation source
Source: Royal Society of Chemistry journal article supplement (doi:10.1039/c9nj05675k), 2020-01-01
Supplement: c9nj05675k1.pdf [file c9nj05675k1.pdf]

## **SUPPORTING INFORMATION**

### **An efficient one-pot synthesis of industrially valuable primary organic carbamates and N-substituted ureas by reusable Merrifield anchored iron(II)-anthra catalyst [Fe<sup>II</sup>(Anthra-Merf)] using urea as a sustainable carbonylation source**

Priyanka Basu<sup>a</sup>, Tusar Kanto Dey<sup>a</sup>, Aniruddha Ghosh<sup>a</sup>, Surajit Biswas<sup>a</sup>, Aslam Khan<sup>b</sup> and Sk.

Manirul Islam<sup>a\*</sup>

<sup>a</sup>*Department of Chemistry, University of Kalyani, Kalyani, Nadia 741235, West Bengal, India*

<sup>b</sup>*King Abdullah Institute for Nanotechnology, King Saud University, Riyadh, 11451, Saudi Arabia*

---

| <b>Serial No.</b> | <b>Contents</b>                                             | <b>Pages</b> |
|-------------------|-------------------------------------------------------------|--------------|
| 1.                | Effect of amount of reactants on benzyl carbamate synthesis | S2           |
| 2.                | Effect of amount of reactants on benzylurea synthesis       | S2-S3        |
| 3.                | <sup>1</sup> HNMR data of carbamates                        | S3-S5        |
| 4.                | <sup>1</sup> HNMR data of N-substituted ureas               | S5           |
| 5.                | <sup>1</sup> HNMR copies of carbamates                      | S6-S14       |
| 6.                | <sup>1</sup> HNMR copies of N-substituted ureas             | S15-S19      |
| 7.                | FTIR spectra of carbamates                                  | S20-S27      |
| 8.                | FTIR spectra of N-substituted ureas                         | S27-S32      |
| 9.                | Reference                                                   | S32          |

### Effect of amount of urea and alcohol on benzyl carbamate formation

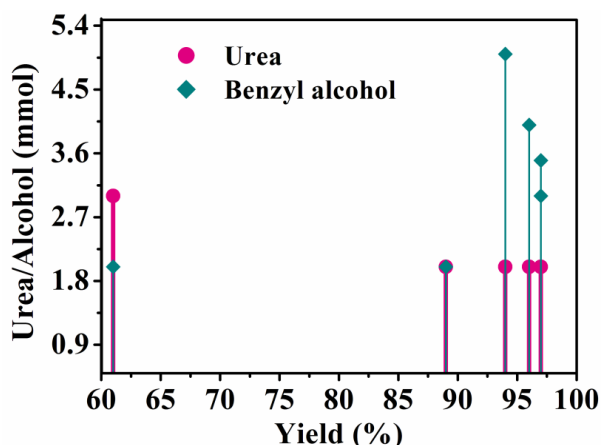

**Fig. S1** Effect of reactant amount (mmol) for benzyl carbamate synthesis. Reaction conditions: urea, benzyl alcohol, 1,4-dioxane (3.5 mL), Fe<sup>II</sup>(Anthra-Merf) catalyst (0.02 g, 0.0188 mmol based on Fe active centre), temperature (120 °C), time (6.5 h).

The concentration of urea (mmol) and benzyl alcohol (mmol) was varied for benzyl carbamate synthesis and to explore the scope of this reaction in a broader sense. The result of these experiments is represented in Fig. S1. After the study of using several amounts of substrate, it revealed that maximum yield was found when urea and alcohol were used in 2:3 mmol ratio. When the alcohol amount was greater than the previous one by keeping the amount of urea constant, the yield of the respective product decreased in a regular pattern. Decreasing the amount of alcohol with respect to urea, the carbamate yield decreases. During carbamate synthesis, the maximum amount of product yield was acquired by taking the urea and alcohol in 2:3 millimolar ratio. In this regard, it is significant to point out that despite the using of excess alcohol no disubstitution occurred in urea, *i.e.* only mono-substituted product was isolated. Hence the mono-substitution is more advantageous than any other reported systems.<sup>1</sup>

### Effect of amount of urea and benzylamine on benzylurea formation

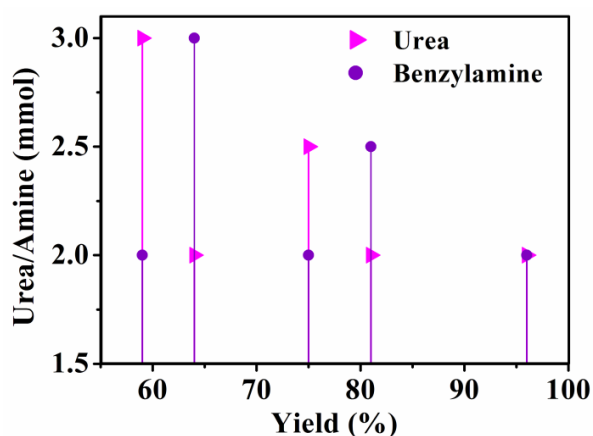

**Fig. S2** Amount of urea and benzylamine for benzylurea synthesis under the usage of 25 mg of Fe<sup>II</sup>(Anthra-Merf) catalyst. Reaction conditions: urea, benzylamine, 1,4-dioxane (3 mL), temperature (100 °C), time (8 h), Fe<sup>II</sup>(Anthra-Merf) catalyst (0.025 g, 0.0235 mmol based on Fe active centre).

For monosubstituted urea synthesis, the various amount of urea and benzylamine were reacted with the Fe<sup>II</sup>(Anthra-Merf) catalyst represented in Fig. S2. In the presence of 0.025 g of catalyst, 2:2 mmol ratio of urea to benzylamine exhibited the maximum yield for unsymmetrical urea (benzylurea) production. Increase in the concentration (mmol) of benzylamine without altering urea's concentration and vice-versa leading to a rapid fall in benzylurea yield. Under the application of ambient condition, various concentration of reactants provided different percentage of yield of benzylurea, from which we get the maximum one with respect to 2 mmol of urea and 2 mmol of benzylamine.

### ***<sup>1</sup>HNMR data of carbamates***

#### **Decyl carbamate**

<sup>1</sup>HNMR (400 MHz, CDCl<sub>3</sub>): δ0.837-0.894 (m, 3H), 1.123-1.420 (m, 14H), 1.524-1.626 (m, 2H), 3.580-3.639 (m, 2H), 4.849 (s, 1H) ppm.

#### **Pentyl carbamate**

<sup>1</sup>HNMR (400 MHz, CDCl<sub>3</sub>): δ0.840-0.873 (m, 3H), 1.420-1.472 (m, 2H), 1.586-1.624 (t, *J*=8.4 Hz, 4H), 4.007-4.041 (m, 2H), 4.551 (s, 2H) ppm.

#### **Butyl carbamate**

<sup>1</sup>HNMR (400 MHz, CDCl<sub>3</sub>): δ0.897-0.964 (m, 3H), 1.341-1.429 (m, 2H), 1.570-1.657 (m, 2H), 4.030-4.078 (m, 2H), 4.738 (s, 2H) ppm.

#### **Isopropyl carbamate**

<sup>1</sup>HNMR (400 MHz, CDCl<sub>3</sub>): δ1.183-1.262 (m, 6H), 4.886-4.948 (m, 1H) ppm.

#### **1-naphthyl carbamate**

<sup>1</sup>HNMR (400 MHz, CDCl<sub>3</sub>): δ5.487 (s, 1H), 6.782-6.801 (d, *J*=7.6 Hz, 1H), 7.234-7.309 (m, 1H), 7.421-7.517 (m, 3H), 7.787-7.824 (m, 1H), 8.160-8.184 (t, *J*=4.4 Hz, 1H) ppm.

#### **2-(diethylamino)ethyl carbamate**

<sup>1</sup>HNMR (400 MHz, CDCl<sub>3</sub>): δ0.943-0.979 (t, *J*=7.2 Hz, 6H), 2.482-2.536 (m, 4H), 2.584-2.681 (m, 2H), 4.043-4.072 (t, *J*=6 Hz, 2H), 5.106 (s, 2H) ppm.

#### **Octan-3-yl carbamate**

<sup>1</sup>HNMR (400 MHz, CDCl<sub>3</sub>): δ0.874-0.911 (t, *J*=7.6 Hz, 6H), 1.285-1.396 (m, 8H), 1.528-1.573 (m, 2H), 3.938-3.998 (m, 1H), 4.798 (s, 2H) ppm.

### **3-bromopropyl carbamate**

<sup>1</sup>HNMR (400 MHz, CDCl<sub>3</sub>): δ2.150-2.213 (m, 2H), 3.454-3.503 (m, 2H), 4.194-4.225 (t, *J*=6.8 Hz, 2H), 4.711 (s, 2H) ppm.

### **Benzyl carbamate**

<sup>1</sup>HNMR (400 MHz, CDCl<sub>3</sub>): δ5.190 (s, 2H), 7.263 (s, 1H), 7.374-7.392 (t, *J*=4.8 Hz, 4H) ppm.

### **4-chlorobenzyl carbamate**

<sup>1</sup>HNMR (400 MHz, CDCl<sub>3</sub>): δ4.639 (s, 2H), 5.037 (s, 1H) 7.259-7.328 (m, 4H) ppm.

### **4-fluorobenzyl carbamate**

<sup>1</sup>HNMR (400 MHz, CDCl<sub>3</sub>): δ4.771 (s, 1H), 5.053 (s, 2H), 7.017-7.061 (m, 2H), 7.312-7.355 (m, 2H) ppm.

### **4-nitrobenzyl carbamate**

<sup>1</sup>HNMR (400 MHz, CDCl<sub>3</sub>): δ4.841 (s, 2H), 5.201 (s, 2H), 7.505-7.548 (t, *J*=8.8 Hz, 2H), 8.206-8.228 (d, *J*=8.8 Hz, 2H) ppm.

### **2-methoxyphenyl carbamate**

<sup>1</sup>HNMR (400 MHz, CDCl<sub>3</sub>): δ3.805 (s, 3H), 4.614 (s, 1H), 6.879-6.901 (d, *J*=8.8 Hz, 2H), 7.279-7.311 (m, 2H) ppm.

### **Phenethyl carbamate**

<sup>1</sup>HNMR (400 MHz, CDCl<sub>3</sub>): δ2.848-2.881 (t, *J*=6.4 Hz, 2H), 4.261-4.296 (t, *J*=7.2 Hz, 2H), 4.665 (s, 1H), 7.215-7.246 (m, 3H), 7.284-7.333 (m, 2H) ppm.

### **Cyclohexyl carbamate**

<sup>1</sup>HNMR (400 MHz, CDCl<sub>3</sub>): δ1.148-1.367 (m, 6H), 1.450-1.489 (m, 1H), 1.639-1.669 (m, 2H), 1.775-1.833 (m, 2H), 4.650 (m, 2H) ppm.

### **Pyridin-4-yl carbamate**

<sup>1</sup>HNMR (400 MHz, CDCl<sub>3</sub>): δ5.336 (s, 2H), 7.497-7.523 (d, *J*=10.4 Hz, 2H), 7.708-7.716 (d, *J*=3.2 Hz, 2H) ppm.

### **Pyridin-2-yl carbamate**

<sup>1</sup>HNMR (400 MHz, CDCl<sub>3</sub>): δ5.031 (s, 2H), 6.242 (s, 1H), 6.532-6.555 (d, *J*=9.2 Hz, 1H), 7.324-7.440 (m, 2H) ppm.

### **Tert-butyl carbamate**

<sup>1</sup>HNMR (400 MHz, CDCl<sub>3</sub>): δ1.454 (s, 9H), 4.583 (s, 2H) ppm.

### **<sup>1</sup>HNMR data of N-substituted ureas**

#### **N-phenylurea**

<sup>1</sup>HNMR (400 MHz, CDCl<sub>3</sub>): δ6.642 (s, 1H), 7.118-7.153 (m, 1H), 7.305-7.364 (m, 4H) ppm.

#### **Butylurea**

<sup>1</sup>HNMR (400 MHz, CDCl<sub>3</sub>): δ0.904-0.941 (t, *J*=7.2 Hz, 3H), 1.324-1.399 (m, 2H), 1.448-1.520 (m, 2H), 3.123-3.172 (m, 2H), 4.605 (s, 2H), 4.945 (s, 1H) ppm.

#### **Cyclohexylurea**

<sup>1</sup>HNMR (400 MHz, CDCl<sub>3</sub>): δ1.136-1.199 (m, 3H), 1.305-1.407 (m, 2H), 1.584-1.736 (m, 5H), 3.438-3.484 (m, 1H), 4.333 (s, 1H), 4.455 (s, 1H) ppm.

#### **Hexylurea**

<sup>1</sup>HNMR (400 MHz, CDCl<sub>3</sub>): δ0.869-0.898 (t, *J*=7.2 Hz, 3H), 1.295-1.330 (d, *J*=14 Hz, 6H), 1.468-1.518 (m, 2H), 3.126-3.176 (m, 2H), 4.214 (s, 1H), 4.322 (s, 1H), 4.477 (s, 1H) ppm.

#### **Benzylurea**

<sup>1</sup>HNMR (400 MHz, CDCl<sub>3</sub>): δ4.173-4.262 (m, 2H), 5.081 (s, 1H), 5.314 (s, 1H), 7.127-7.276 (m, 5H) ppm.

#### **4-methoxyphenylurea**

<sup>1</sup>HNMR (400 MHz, CDCl<sub>3</sub>): δ3.781 (s, 3H), 6.822-6.845 (m, 2H), 7.328-7.354 (m, 2H), 7.759 (s, 1H) ppm.

#### **Morpholine-4-carboxamide**

<sup>1</sup>HNMR (400 MHz, CDCl<sub>3</sub>): δ3.639 (s, 4H), 3.722 (s, 4H) ppm.

#### **1-methyl-1-phenylurea**

<sup>1</sup>HNMR (400 MHz, CDCl<sub>3</sub>): δ3.259 (s, 3H), 6.168 (s, 2H), 7.143-7.327 (m, 4H), 7.399-7.437 (t, *J*=7.6 Hz, 1H) ppm.

#### **Pyridyl urea**

<sup>1</sup>HNMR (400 MHz, CDCl<sub>3</sub>): δ4.532 (s, 1H), 6.976-7.009 (m, 2H), 7.671-7.714 (m, 1H), 8.355-8.371 (m, 1H) ppm.

#### **(3-pyridyl)urea**

<sup>1</sup>HNMR (400 MHz, CDCl<sub>3</sub>): δ6.723 (s, 2H), 7.523-7.544 (t, *J*=5.2 Hz, 1H), 8.306-8.317 (d, *J*=4.4 Hz, 2H), 8.482-8.488 (d, *J*=2.4 Hz, 2H) ppm.

## <sup>1</sup>HNMR Copies of Carbamates

### Decyl carbamate

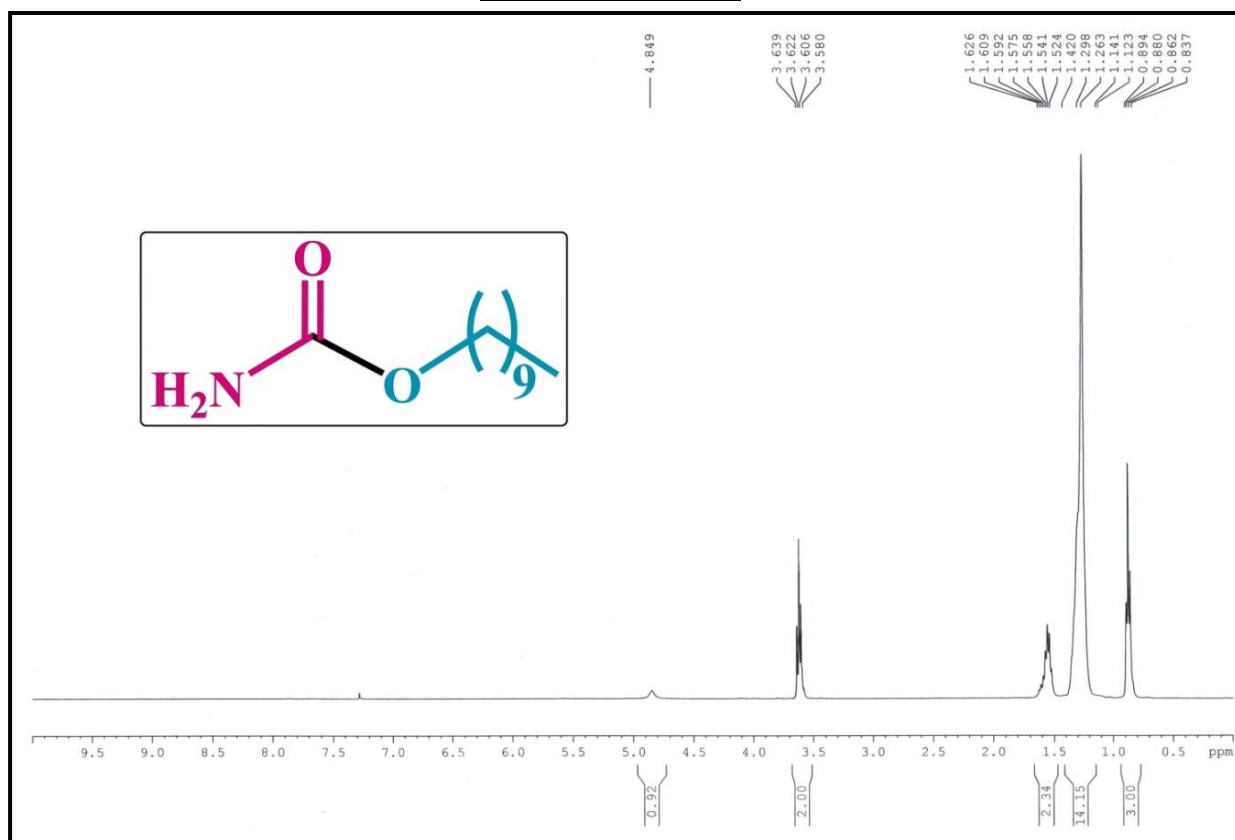

### Pentyl carbamate

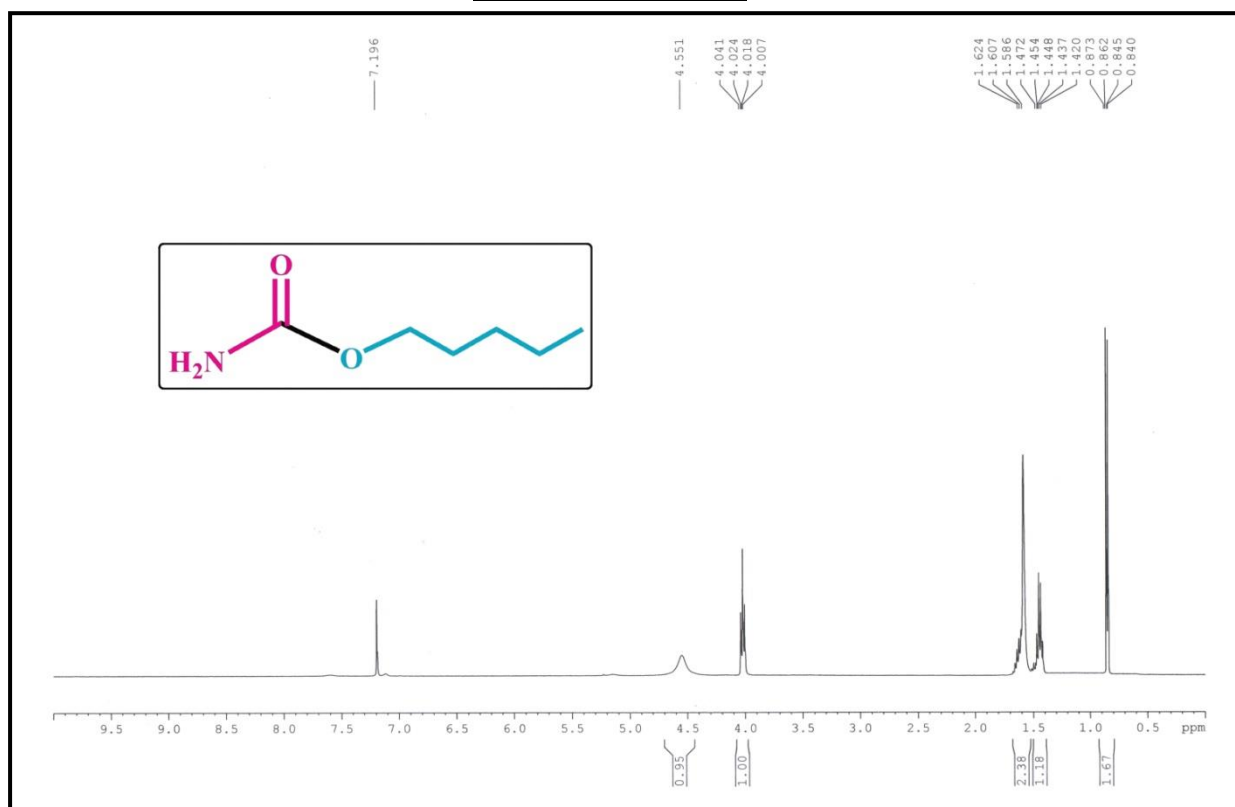

### Butyl carbamate

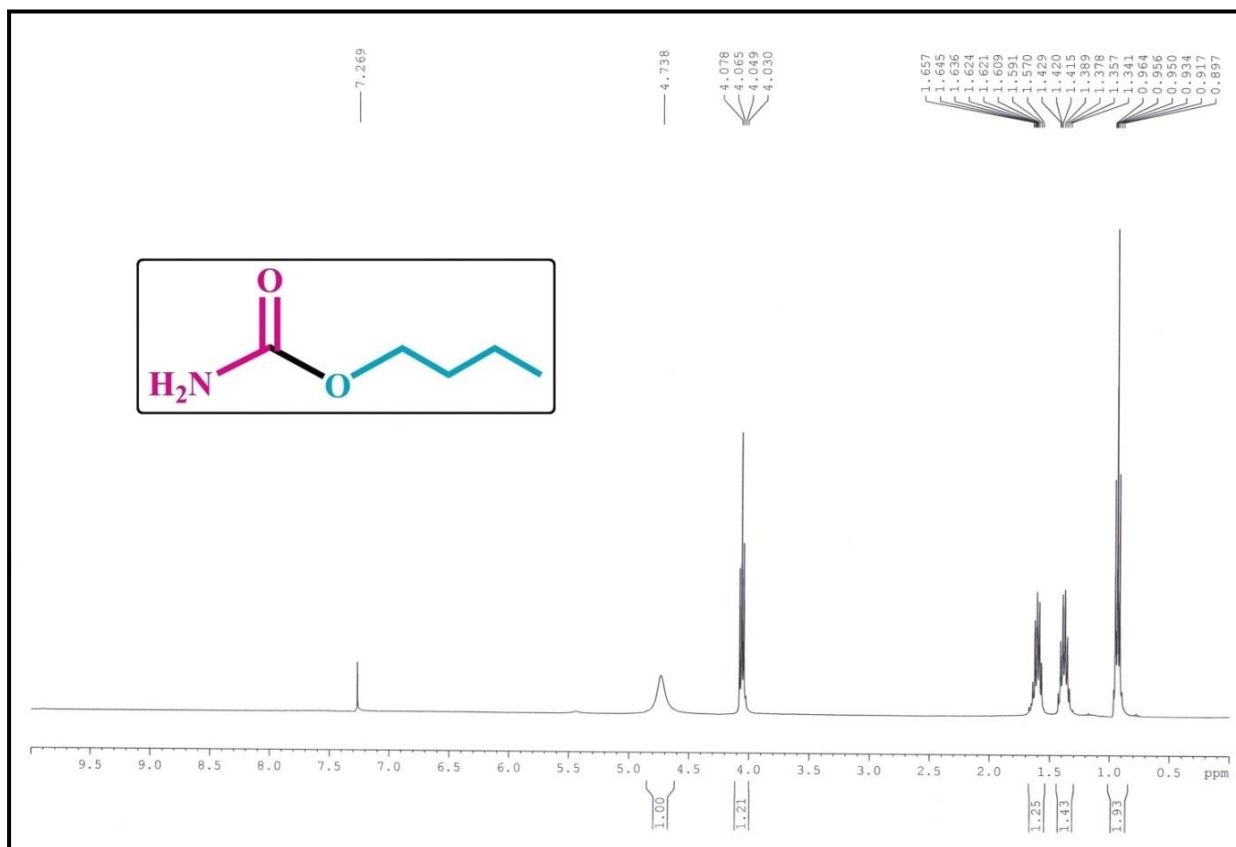

### Isopropyl carbamate

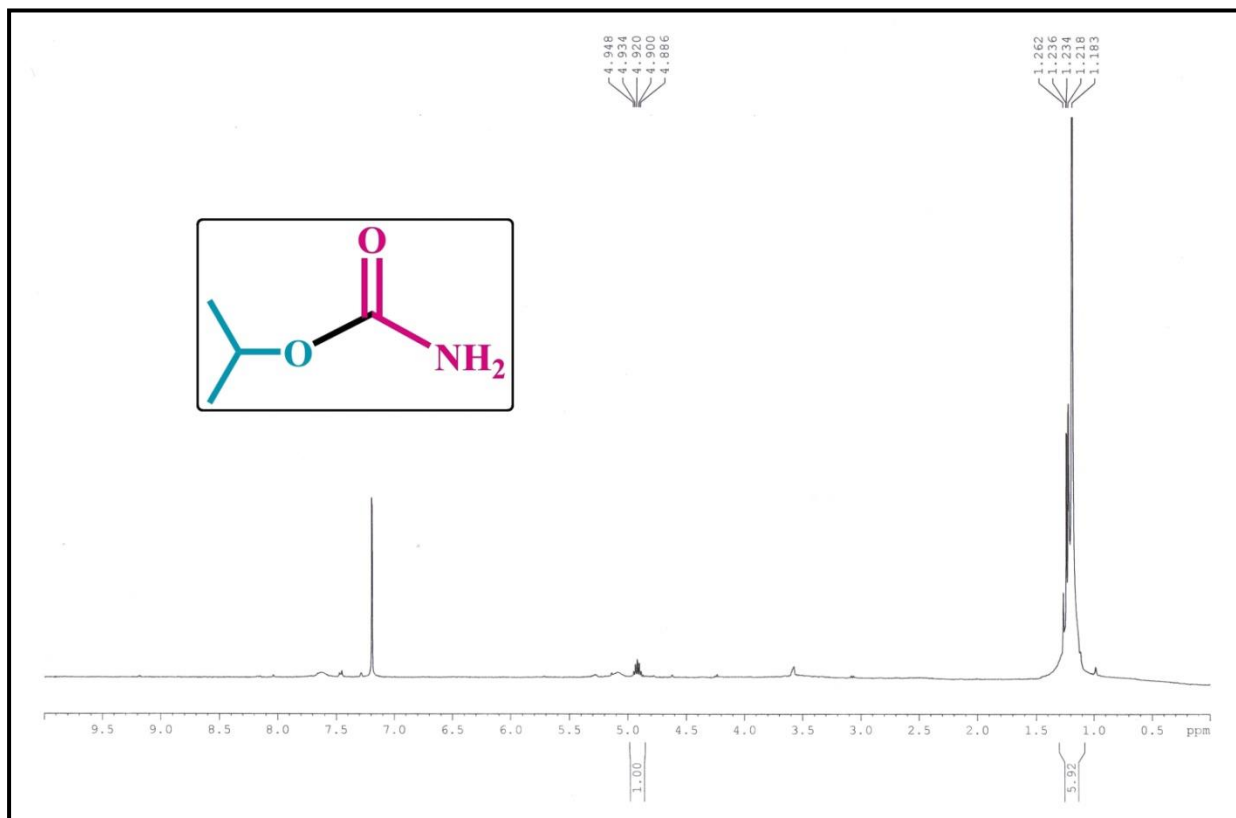

### 1-naphthyl carbamate

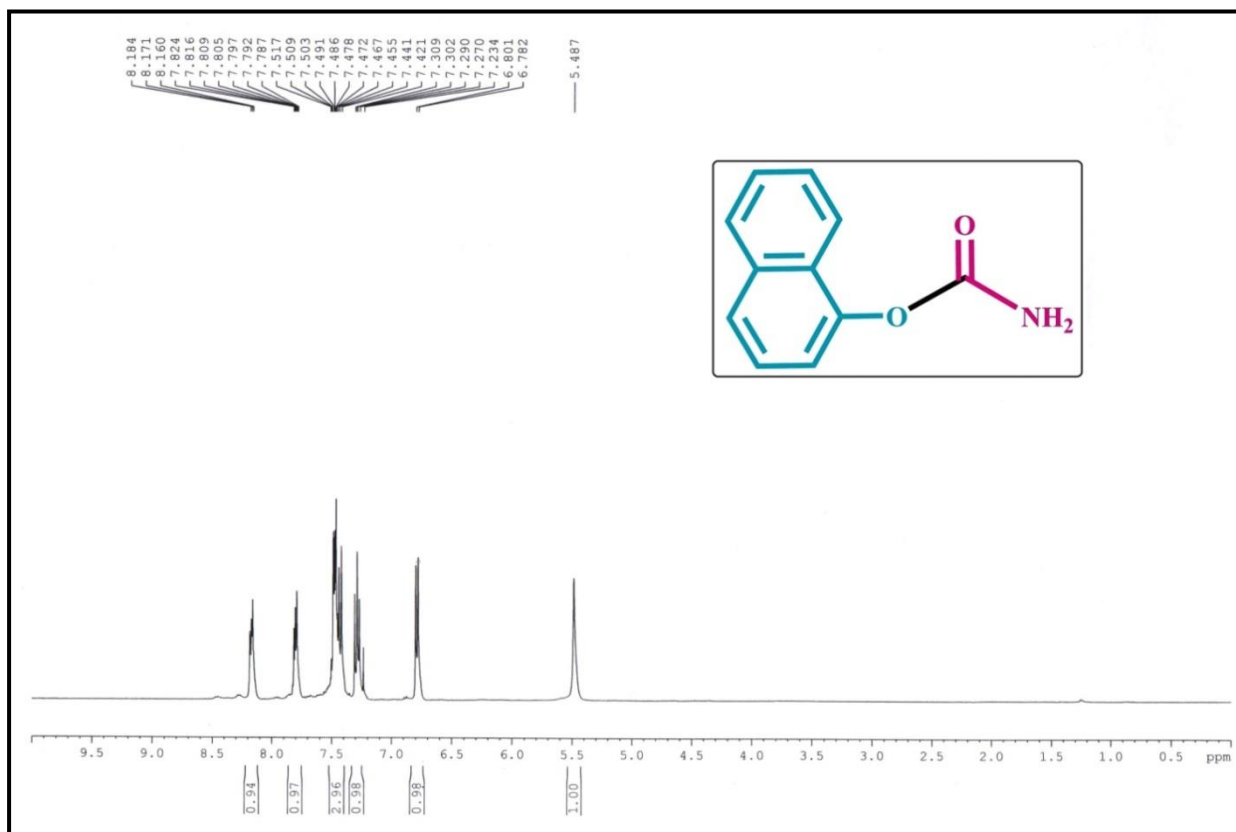

### 2-(diethylamino)ethyl carbamate

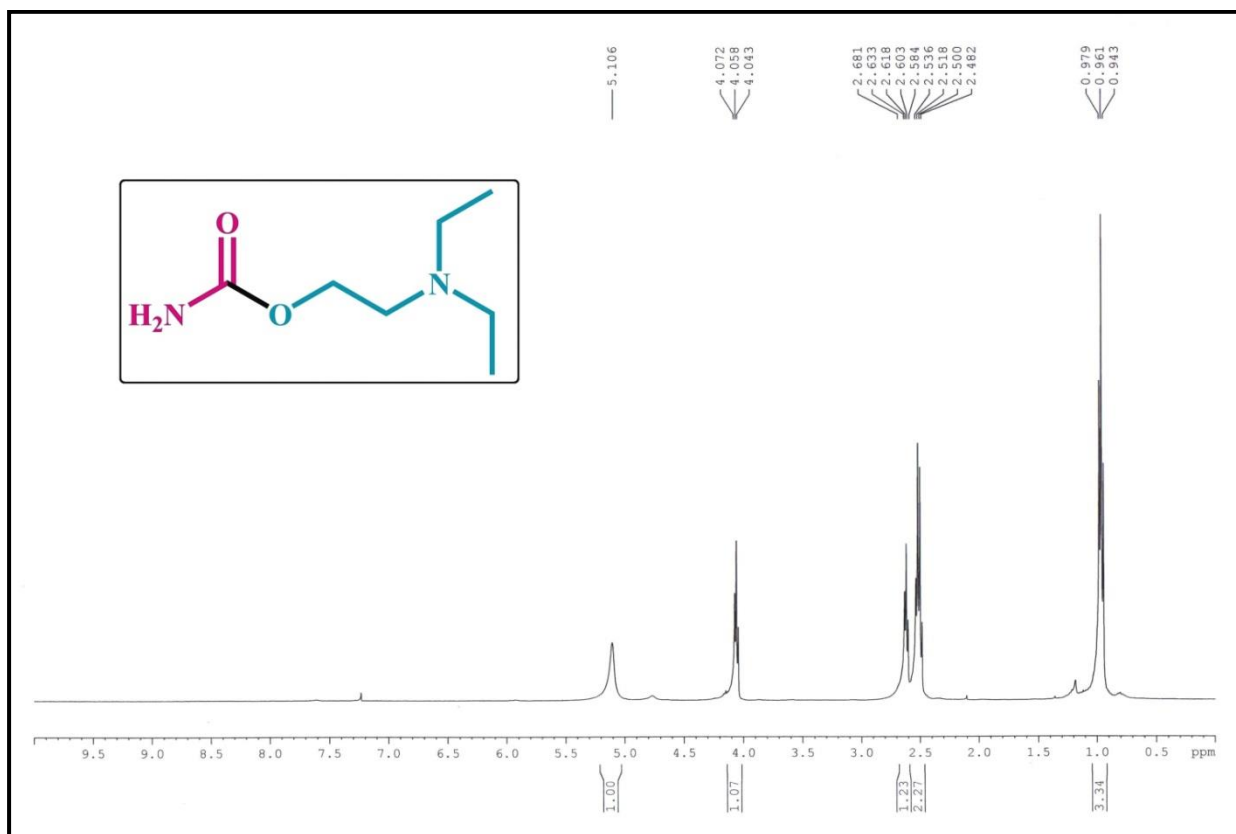



### Octan-3-yl carbamate

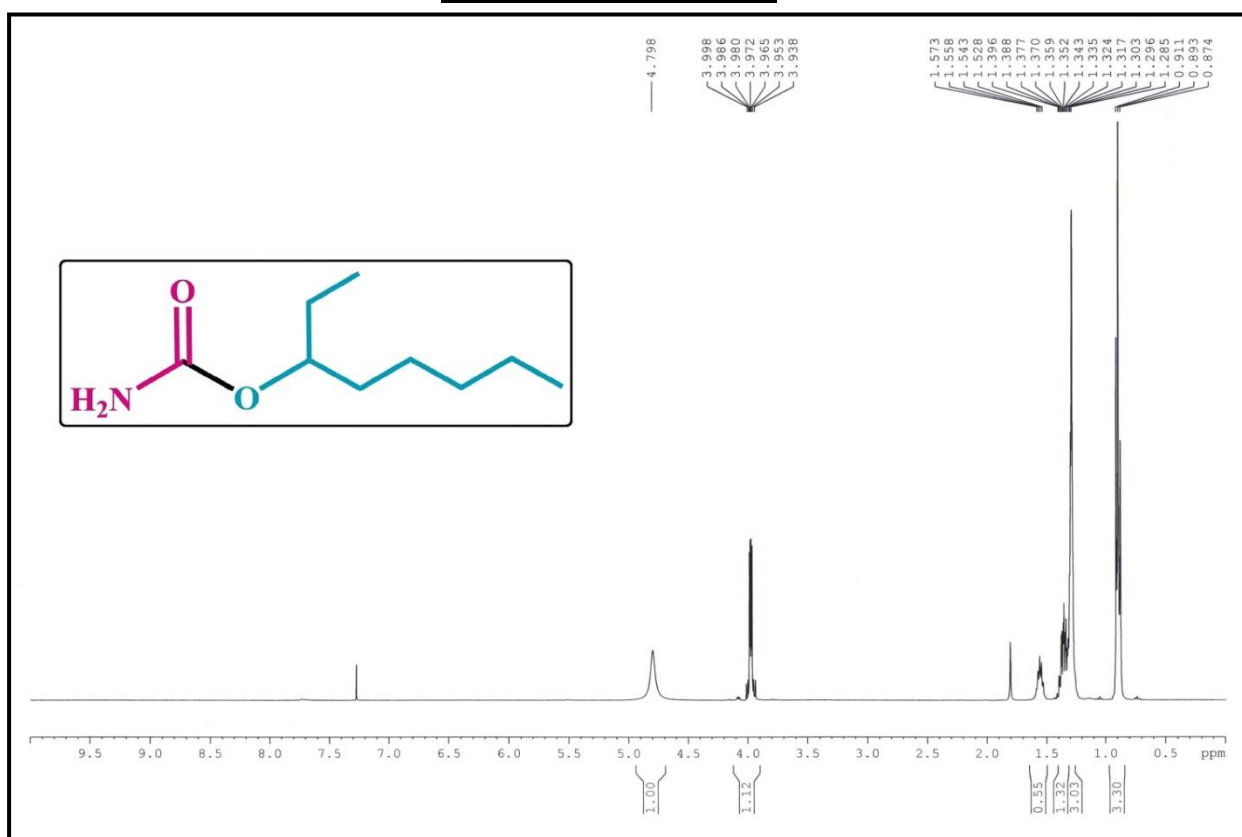

### 3-bromopropyl carbamate

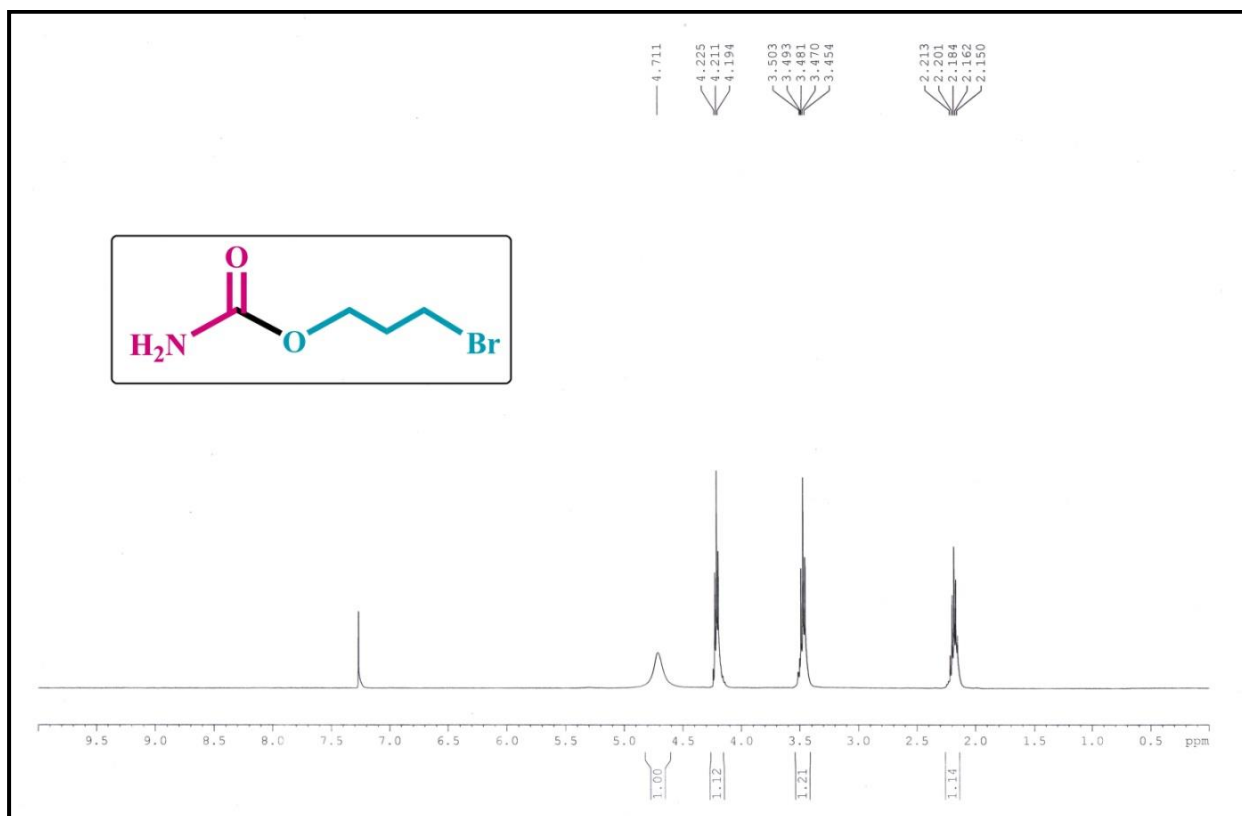

### Benzyl carbamate

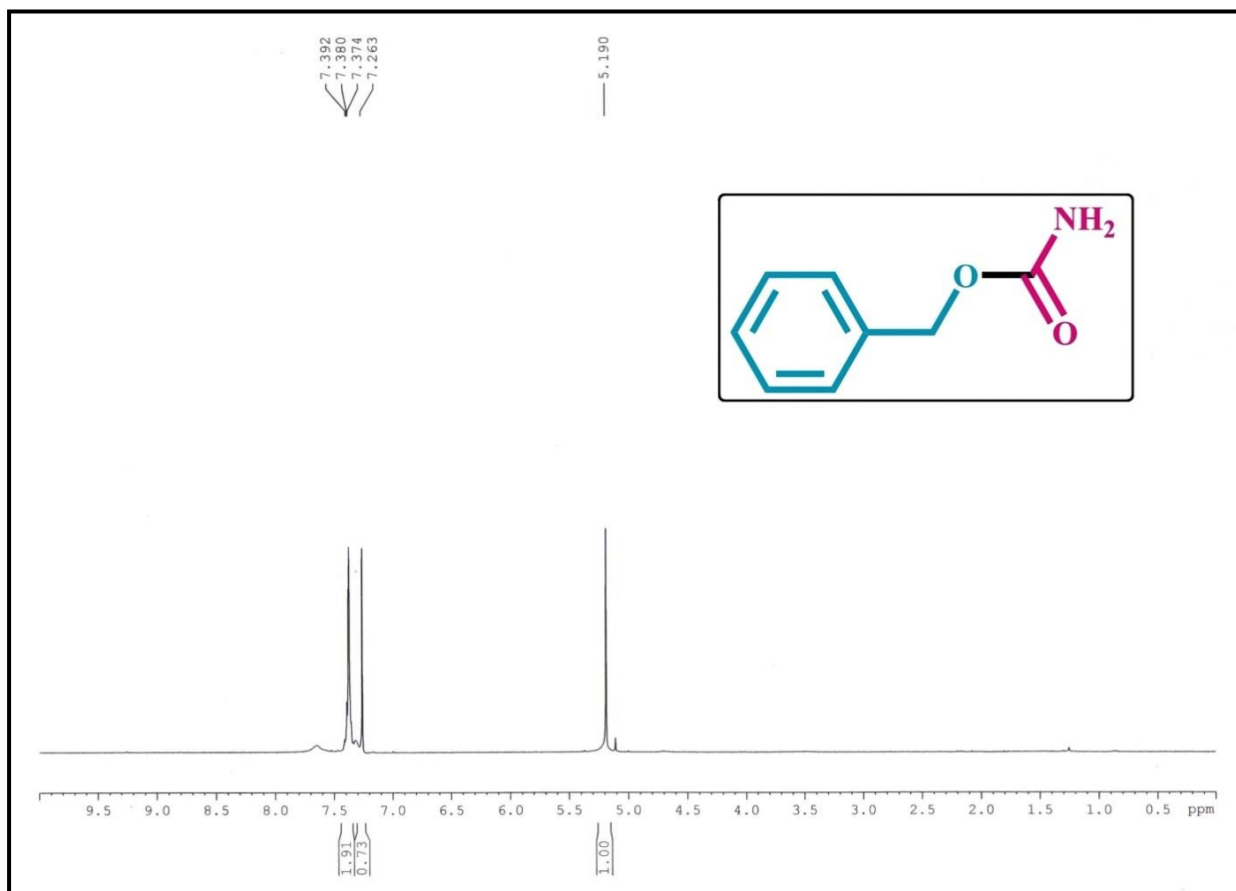

### 4-chlorobenzyl carbamate

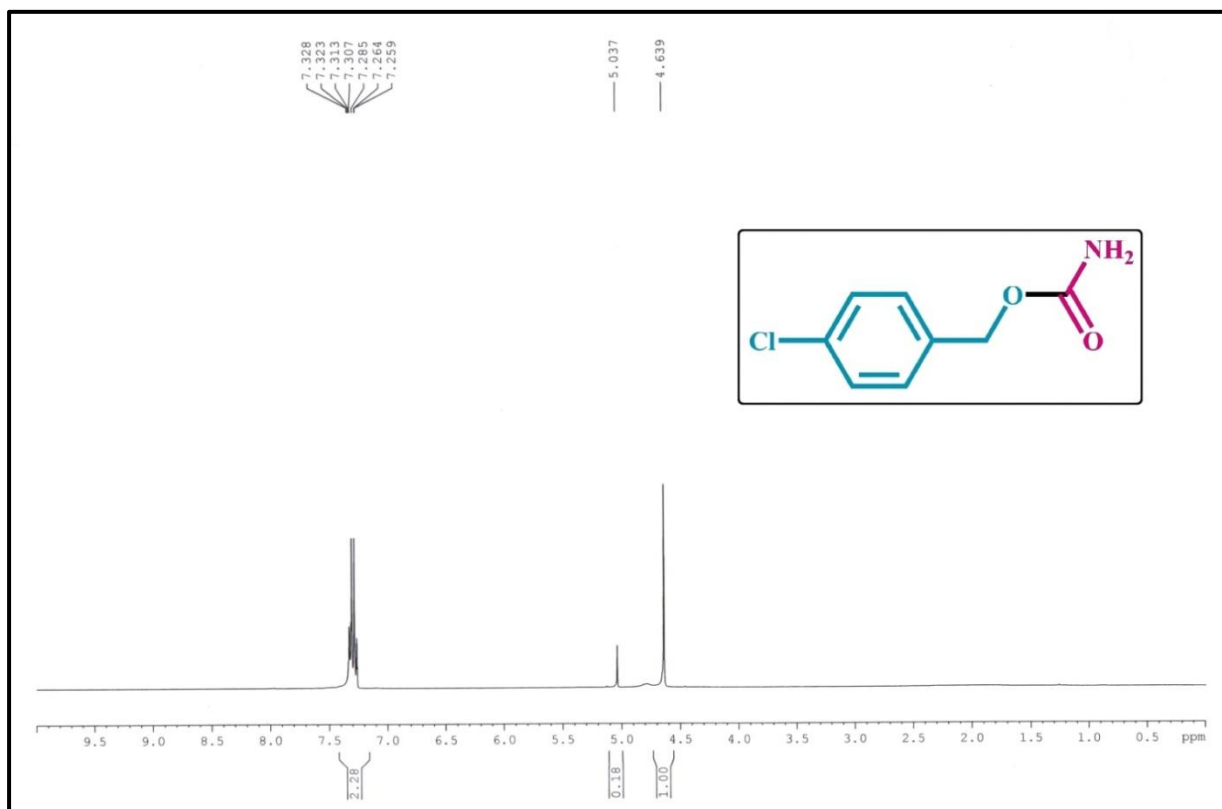

### 4-fluorobenzyl carbamate

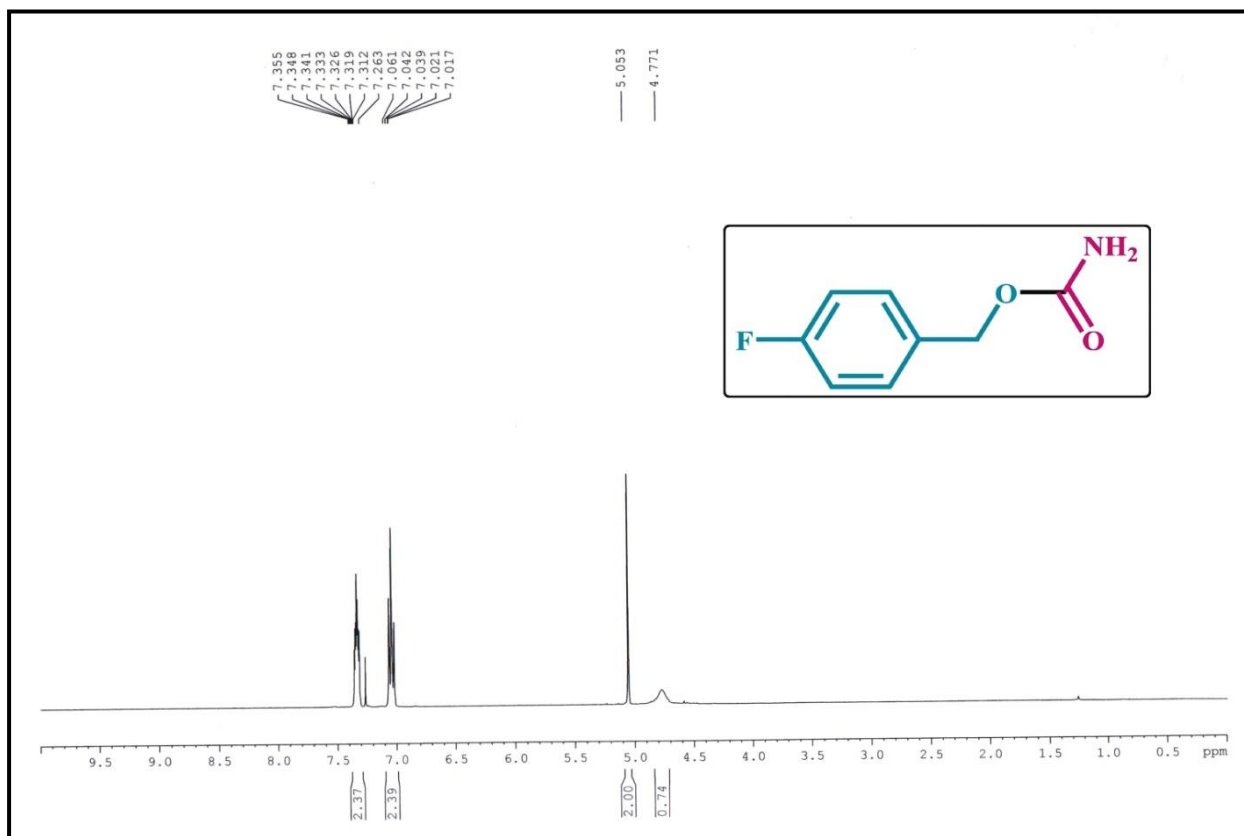

### 4-nitrobenzyl carbamate

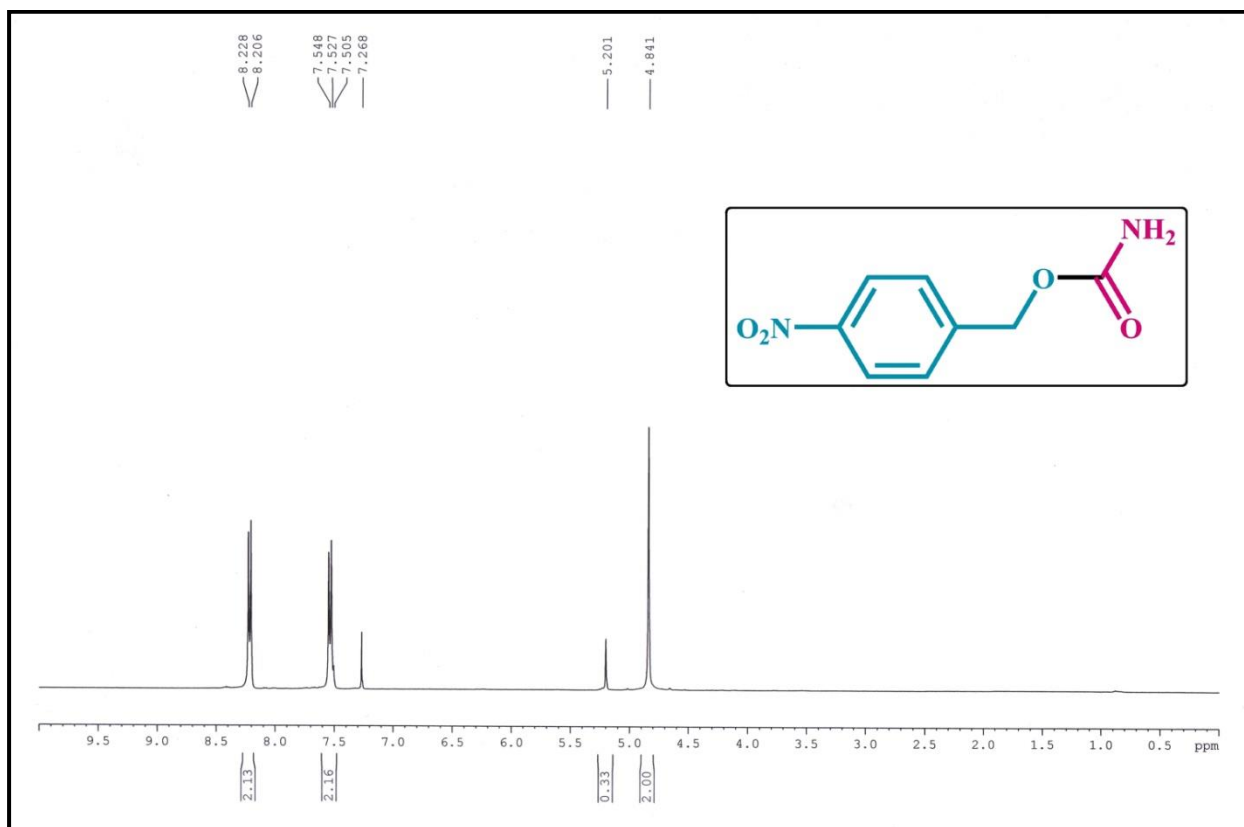

## 2-methoxyphenyl carbamate

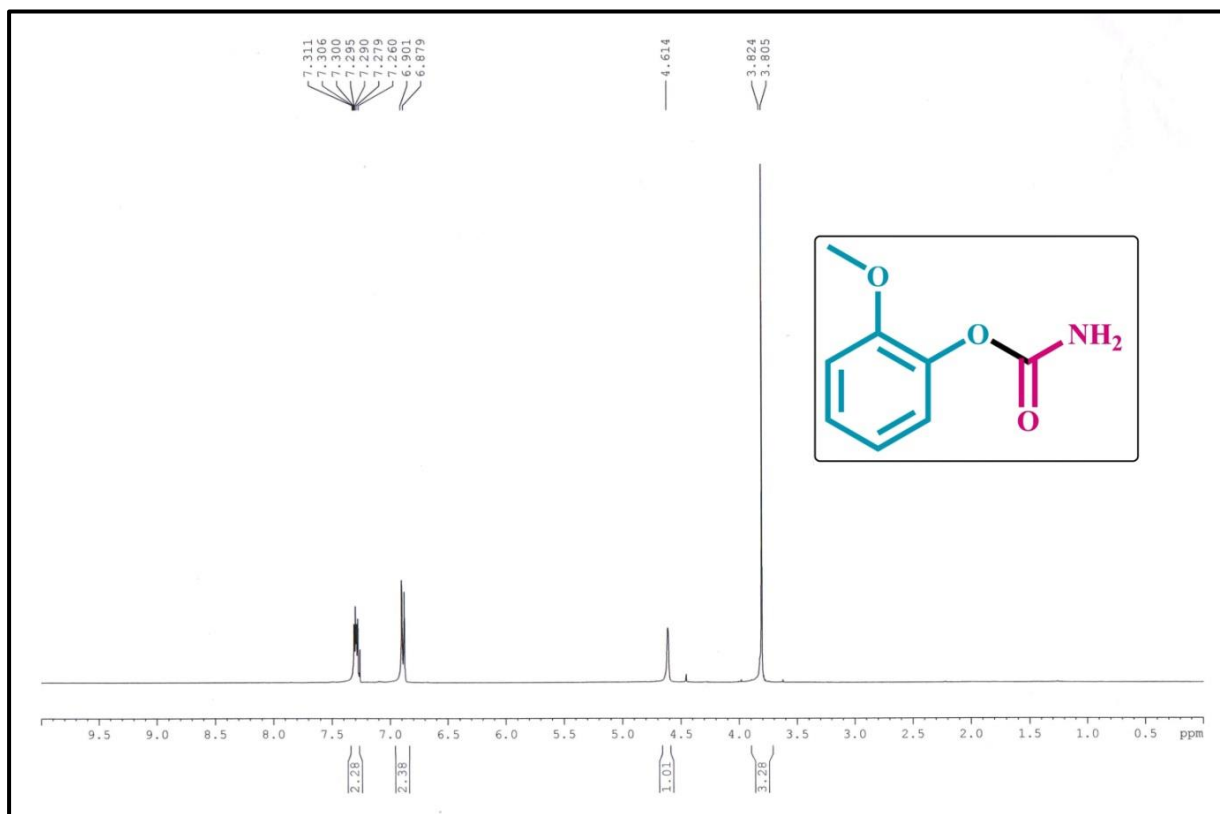

## Phenethyl carbamate

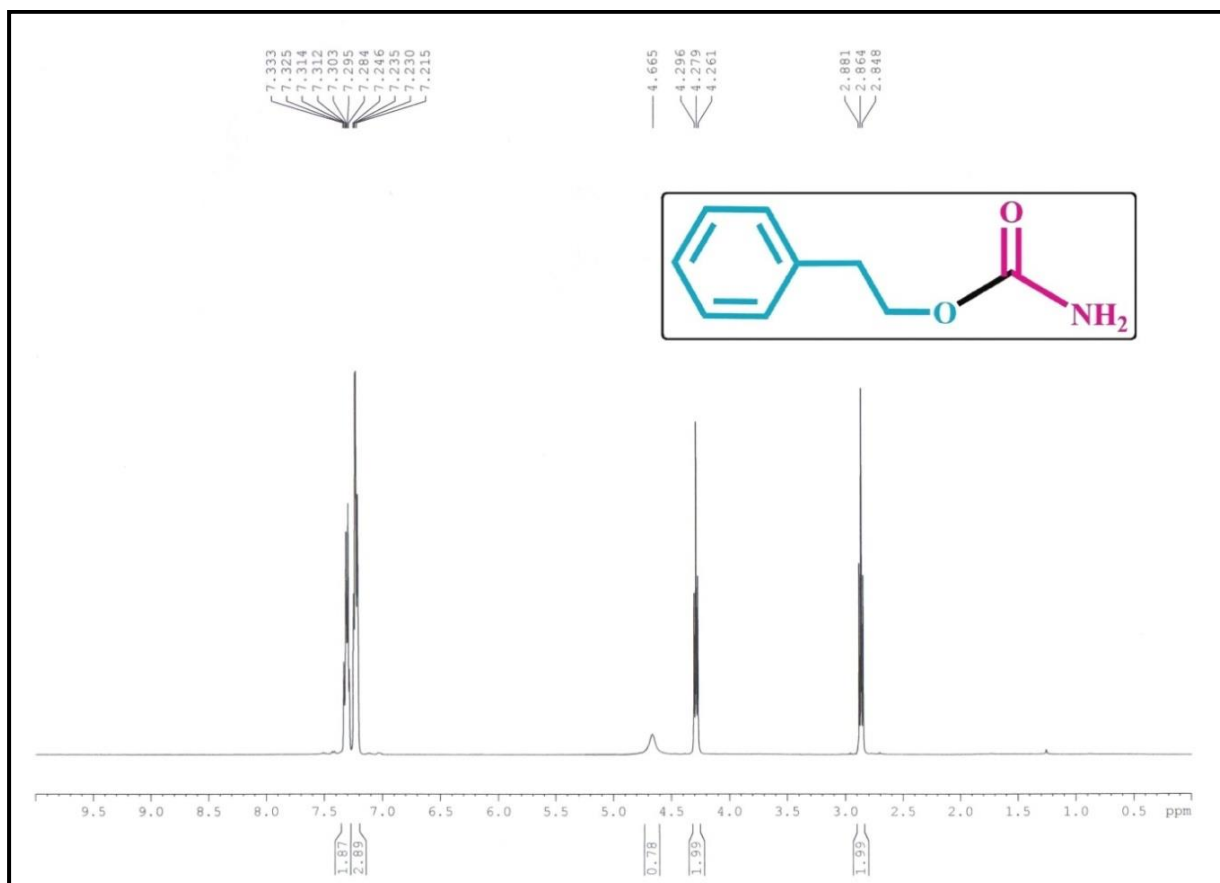

### Cyclohexyl carbamate

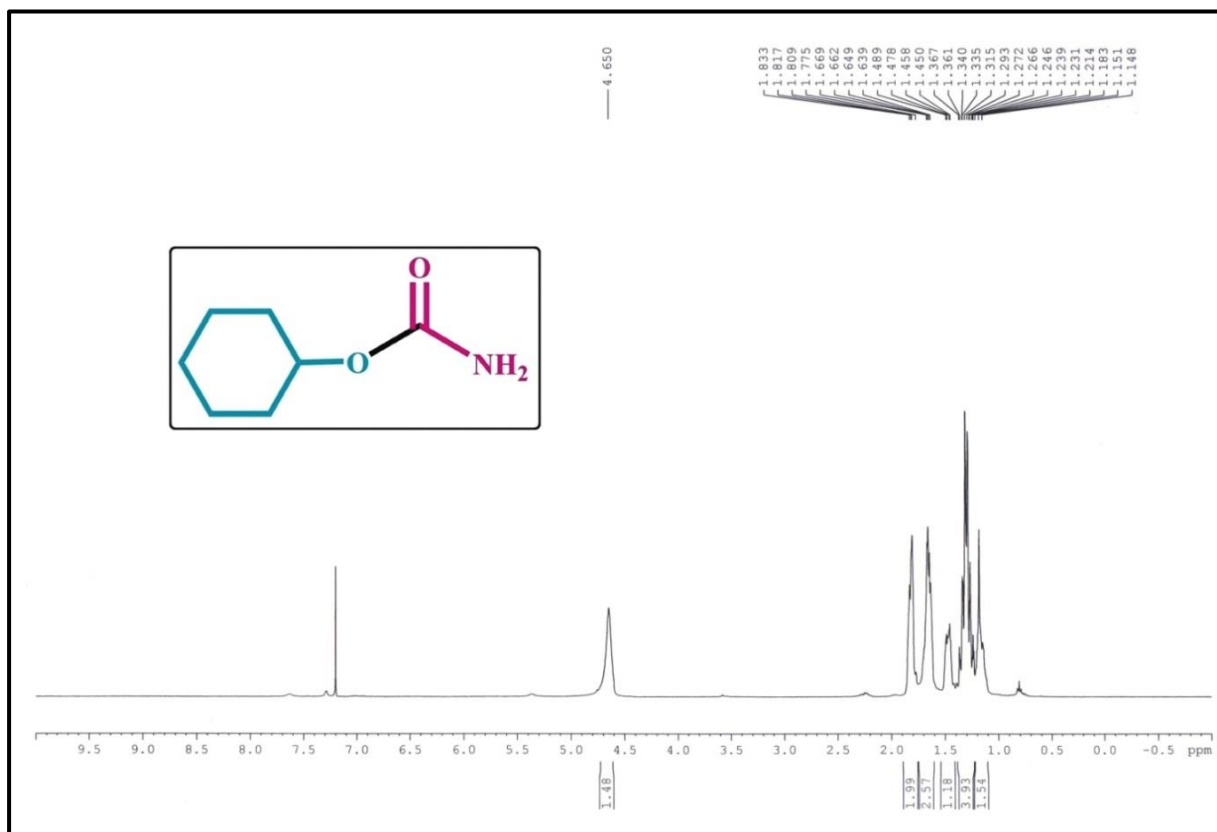

### Pyridin-4-yl carbamate

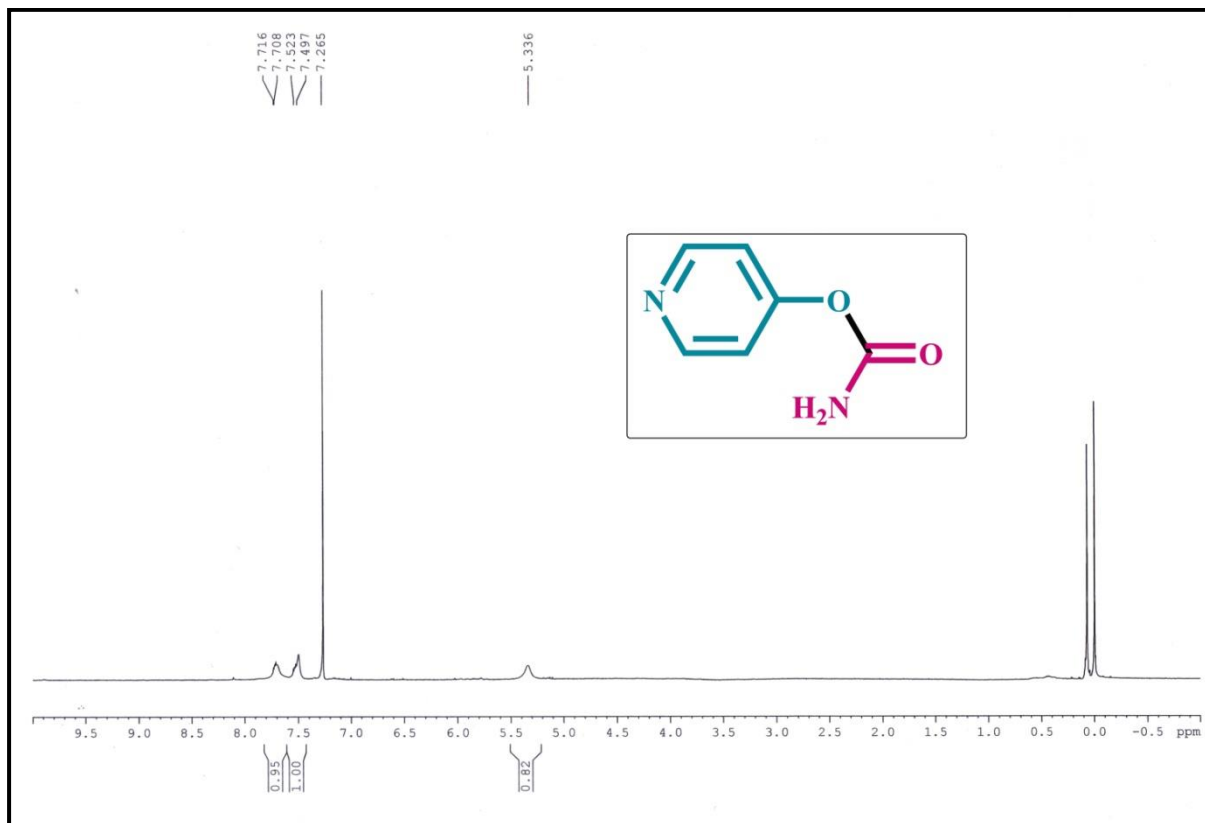

### Pyridin-2-yl carbamate

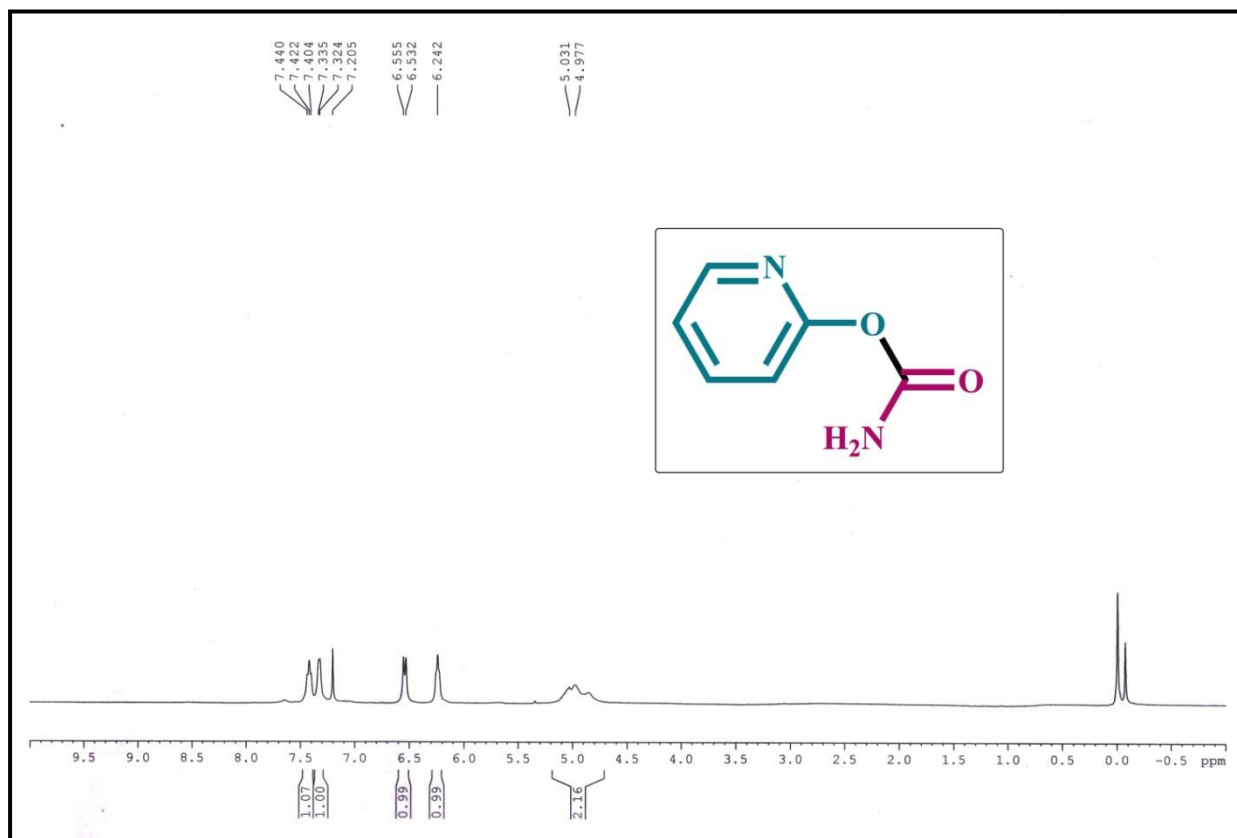

### Tert-butyl carbamate

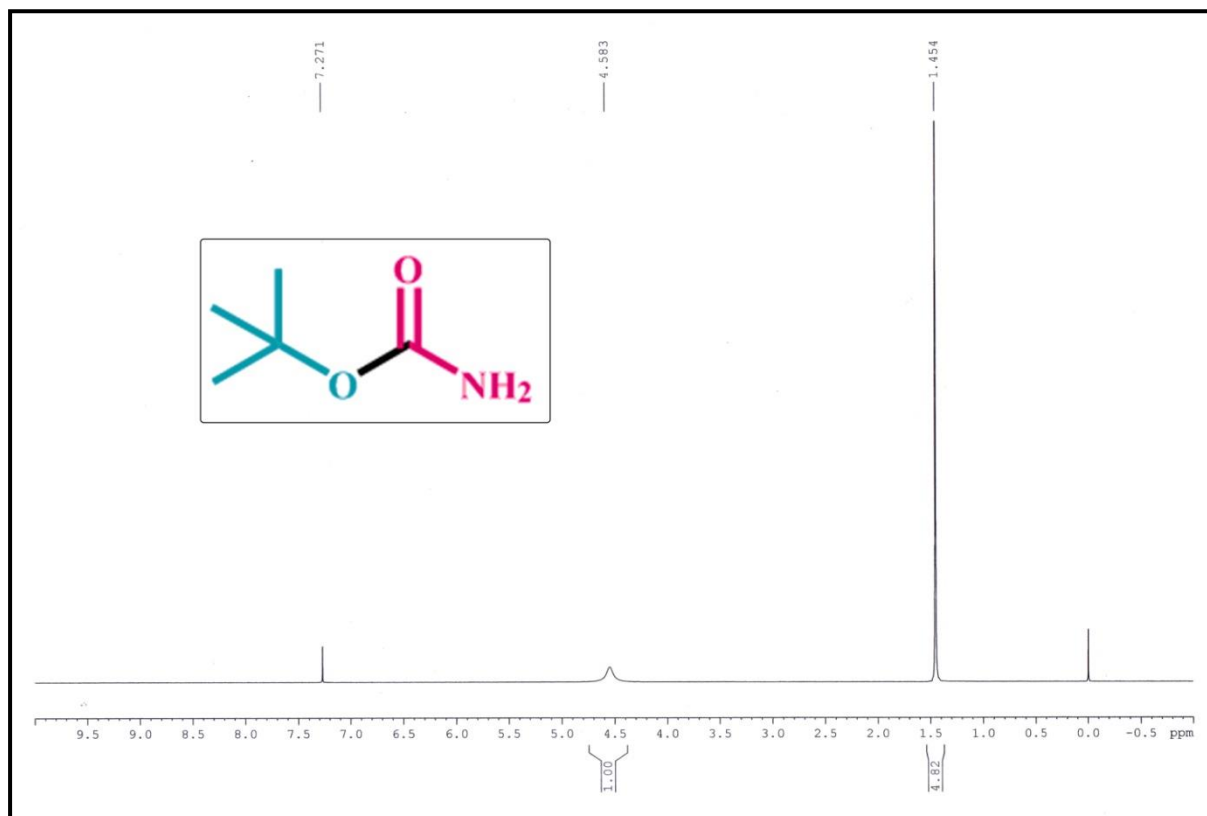

## <sup>1</sup>HNMR Copies of N-substituted ureas

### N-phenylurea

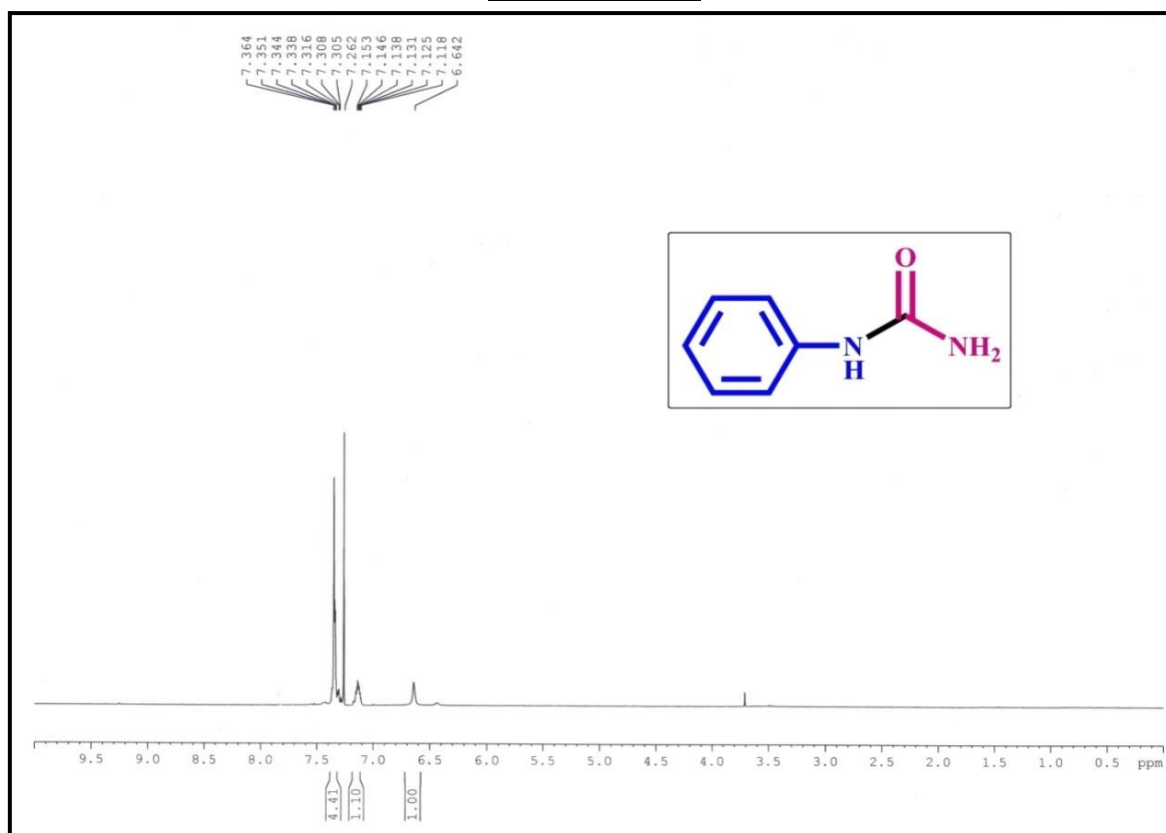

### Butylurea

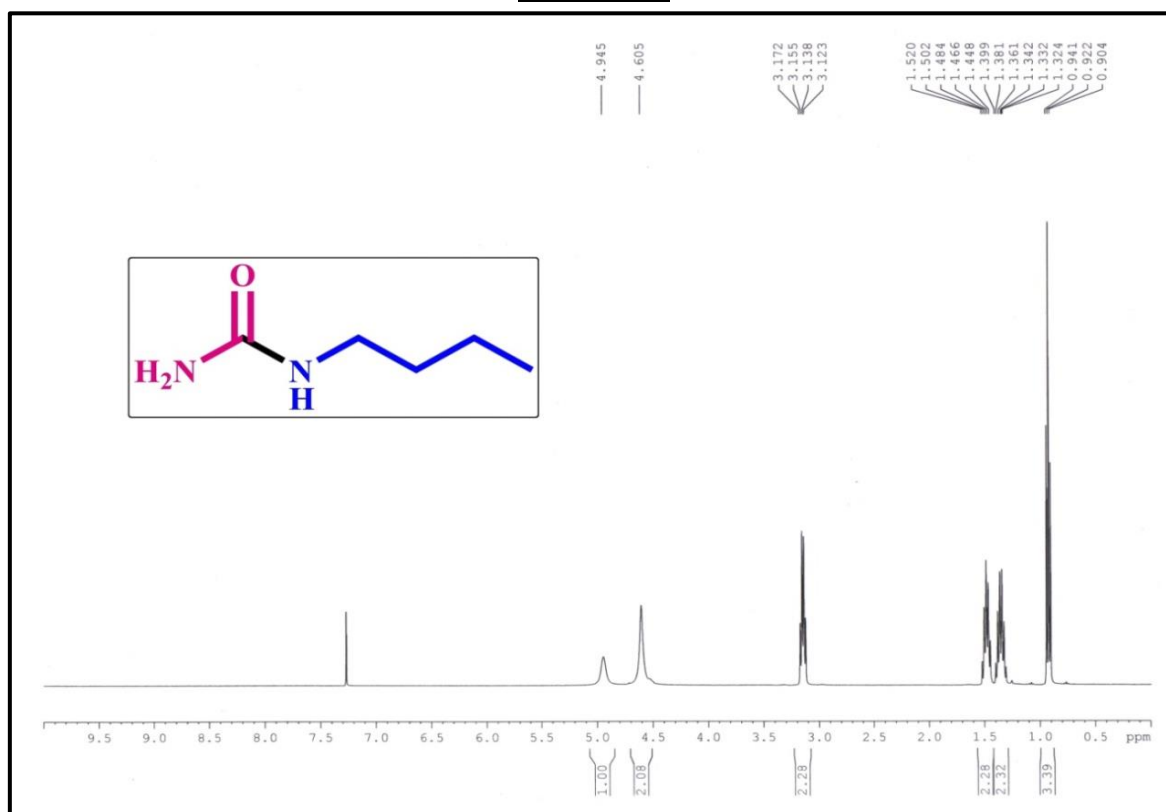

## Cyclohexylurea

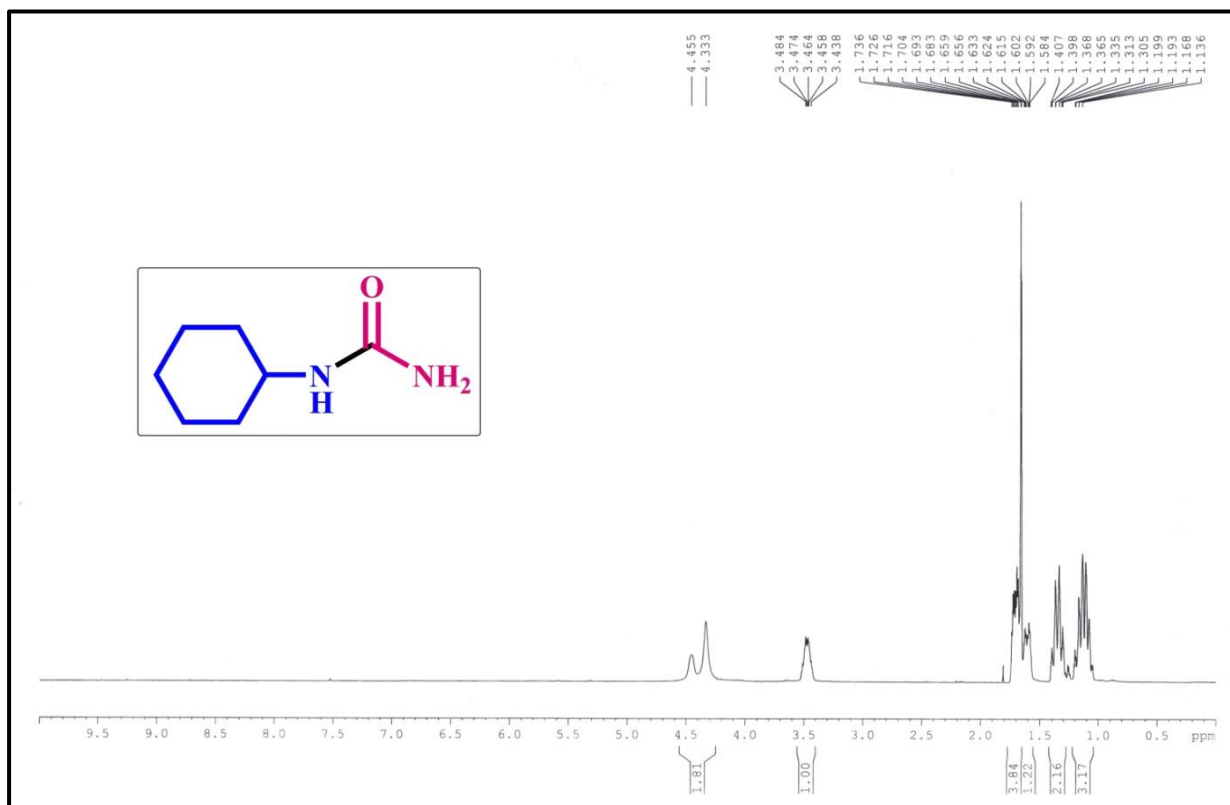

## Hexylurea

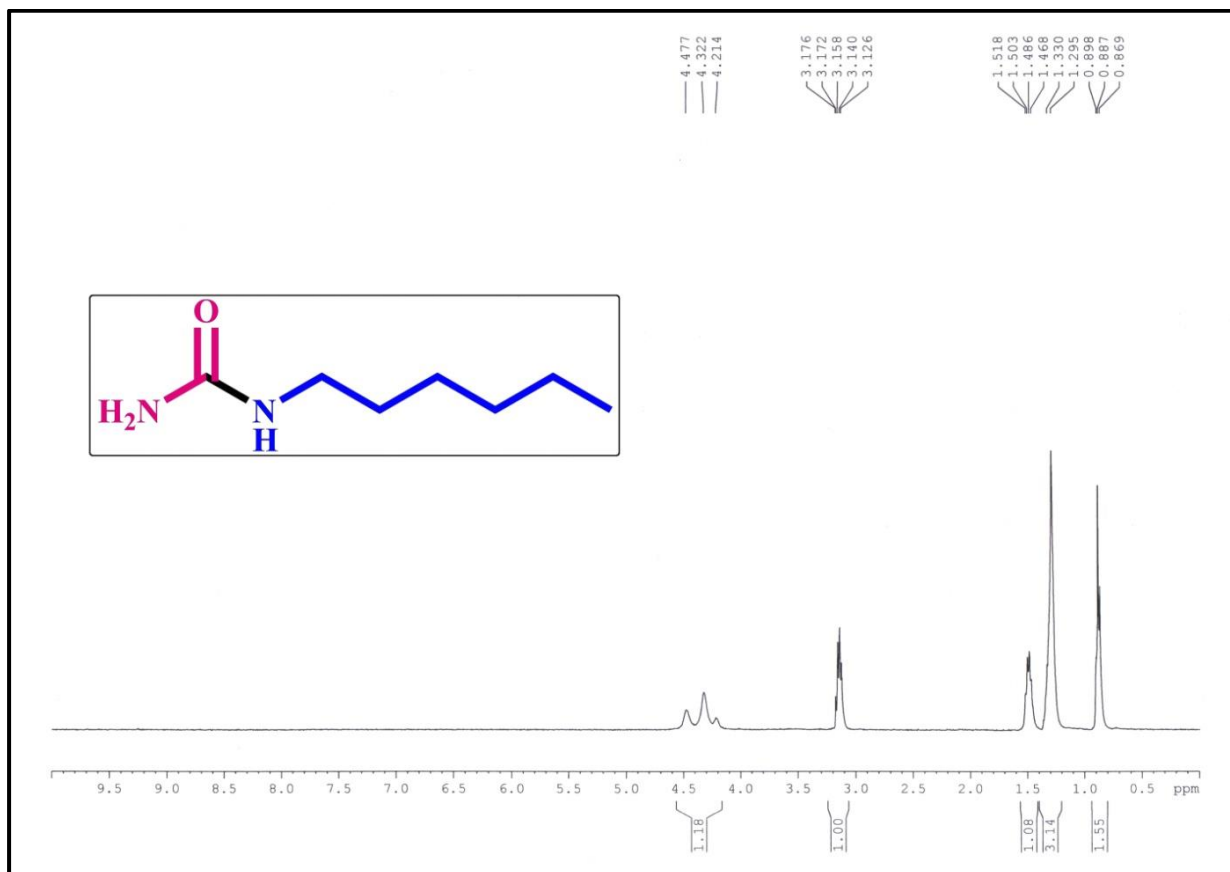



### Benzylurea

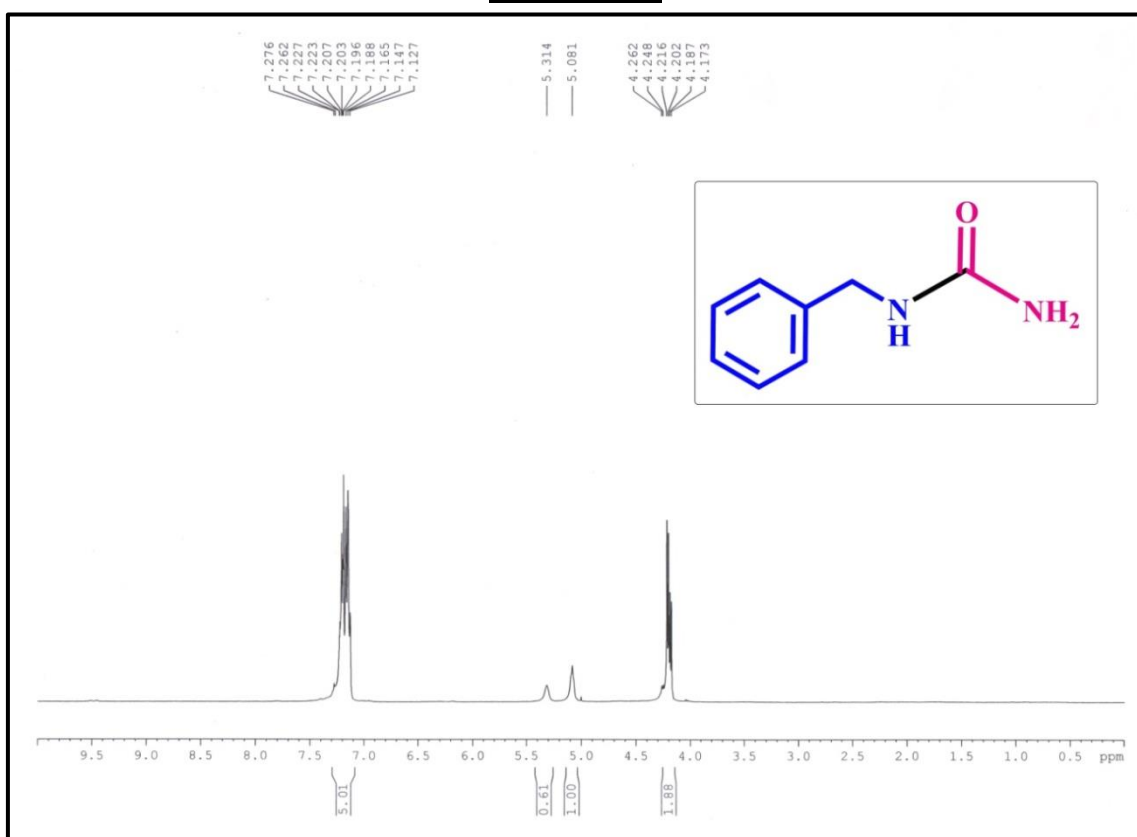

### 4-methoxyphenylurea

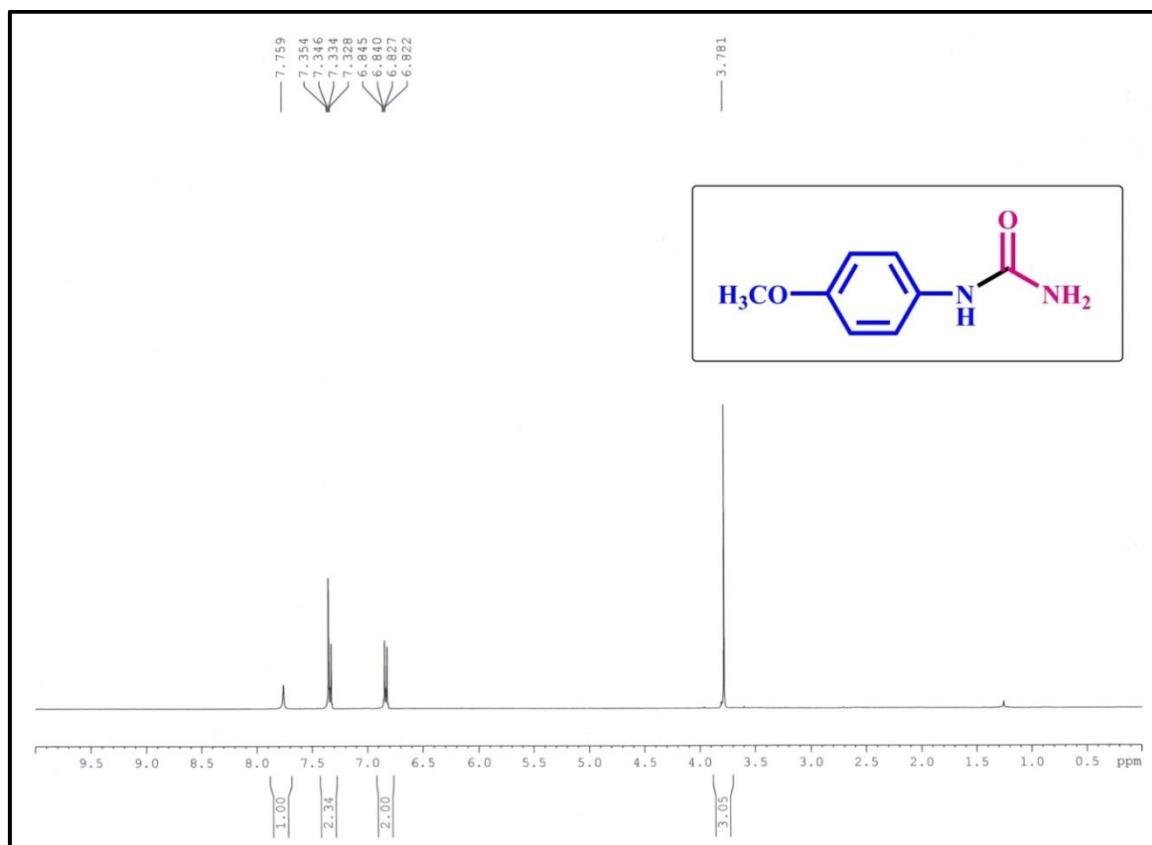

### Morpholine-4-carboxamide

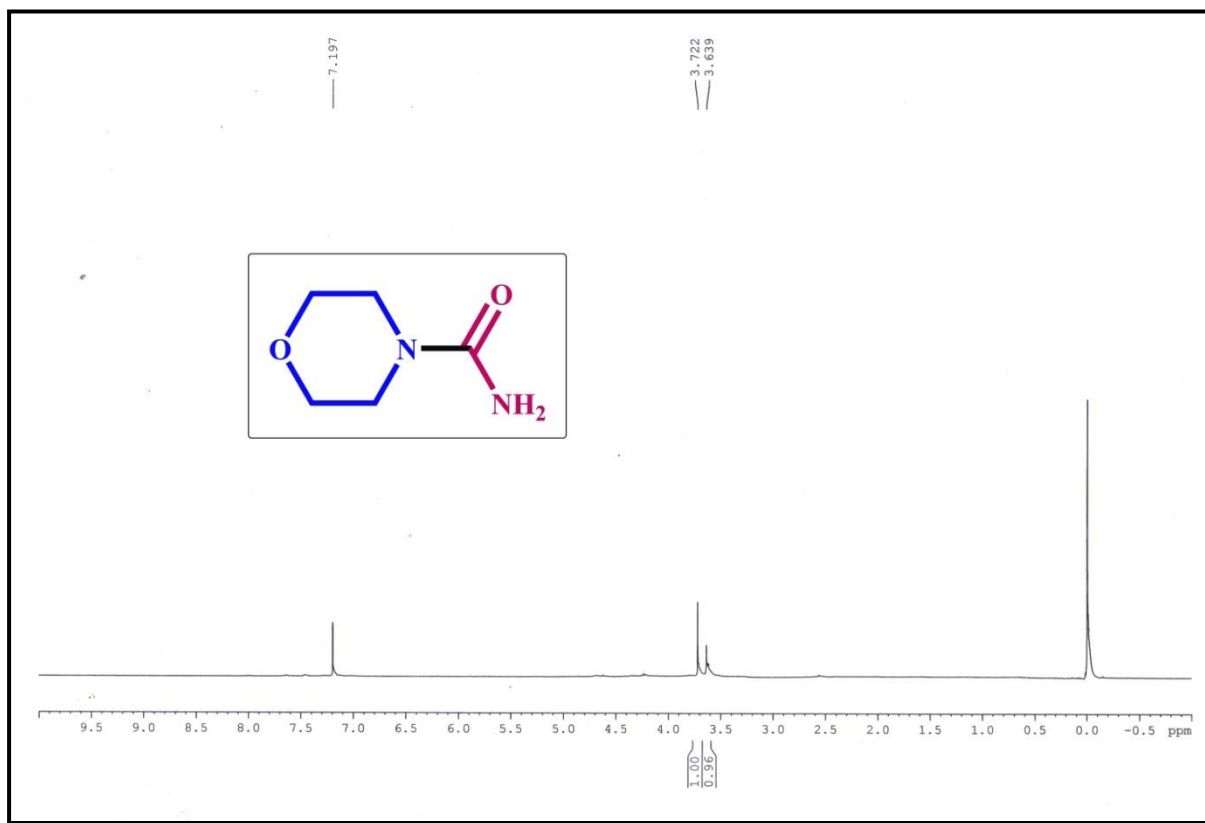

### 1-methyl-1-phenylurea

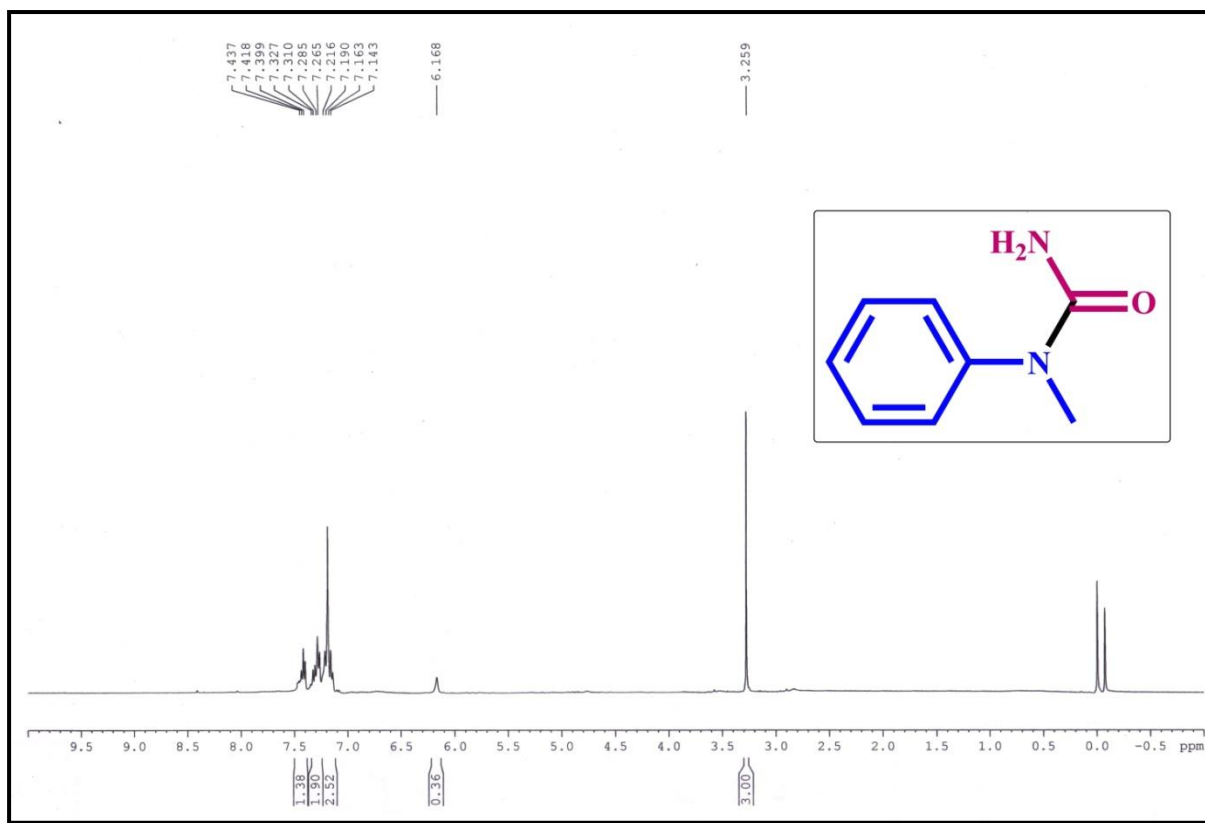

### Pyridyl urea

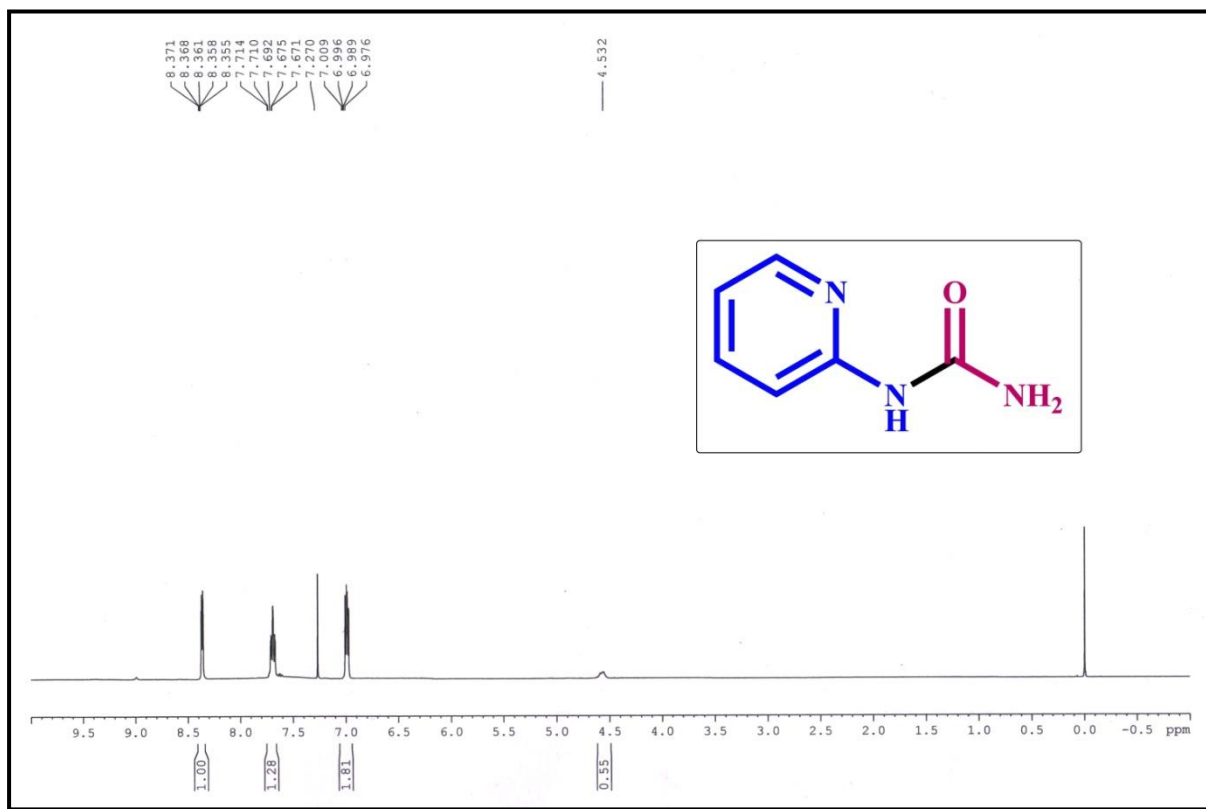

### (3-pyridyl)urea

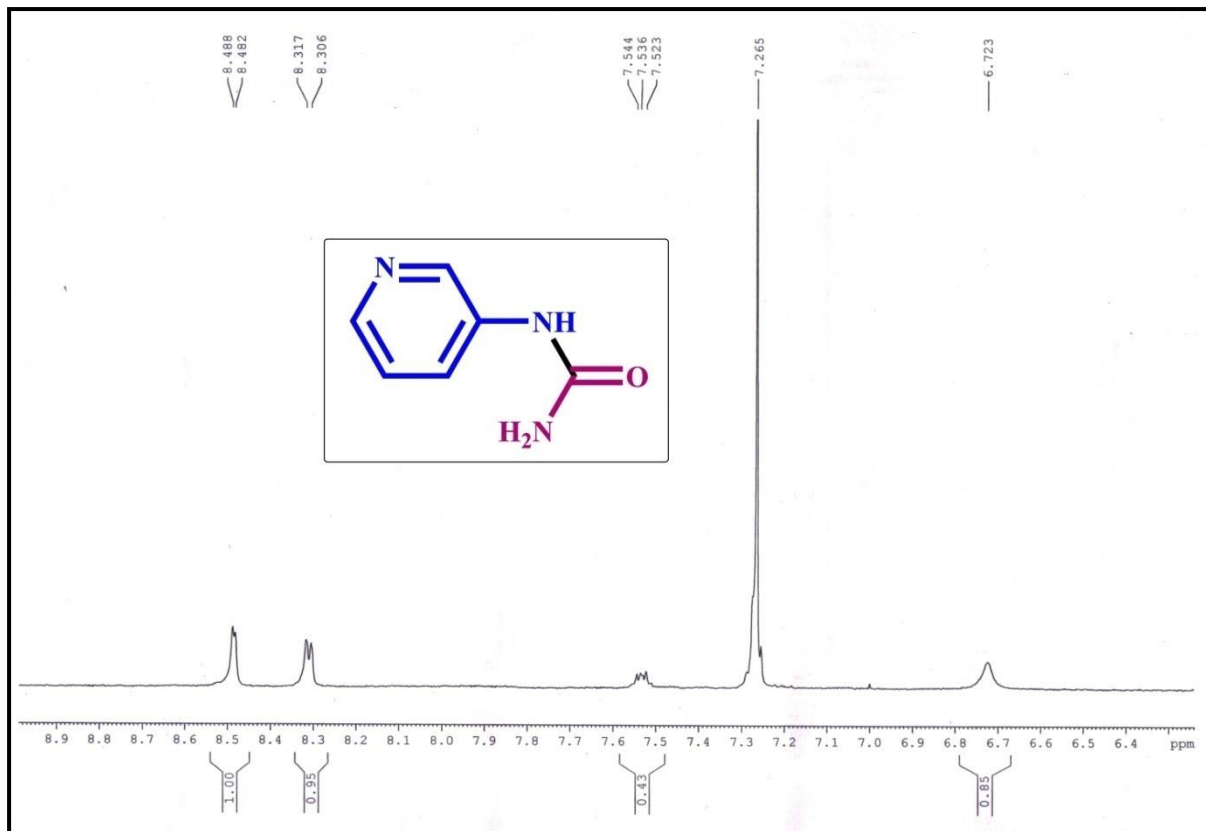

FTIR spectra of Carbamates

Decyl carbamate

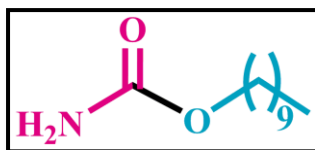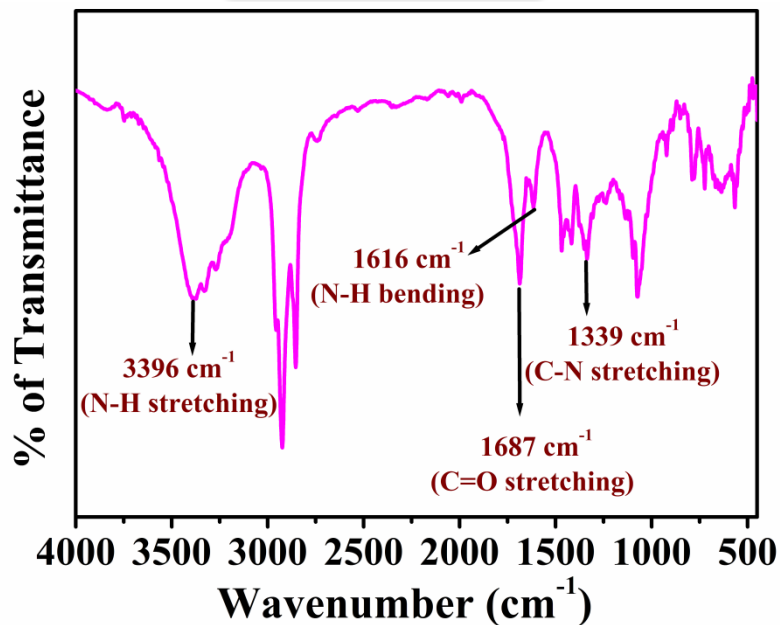

Pentyl carbamate

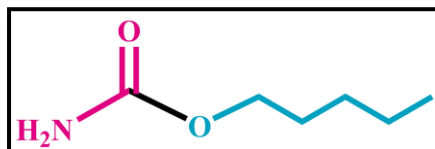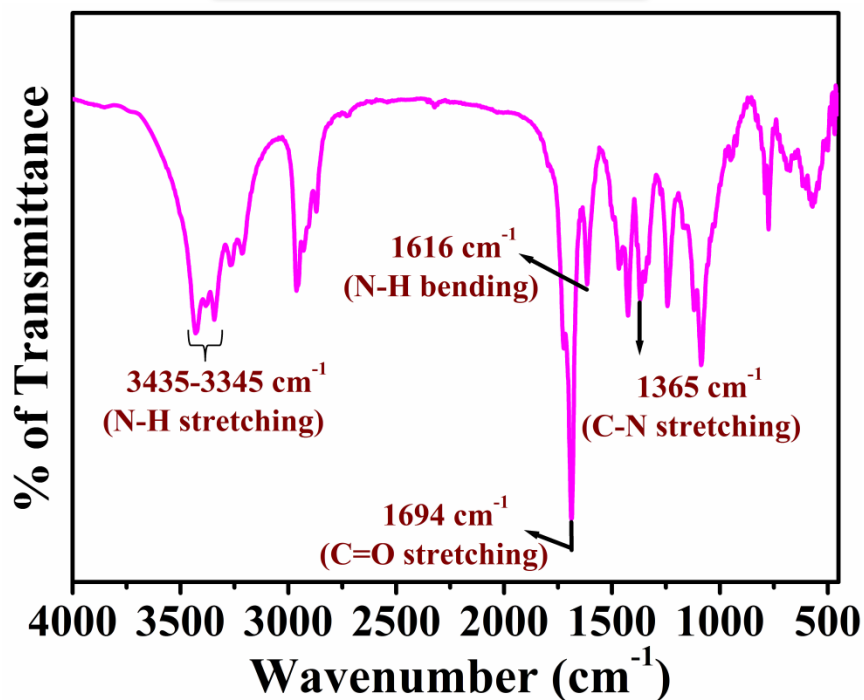

### 1-naphthyl carbamate

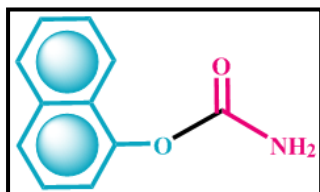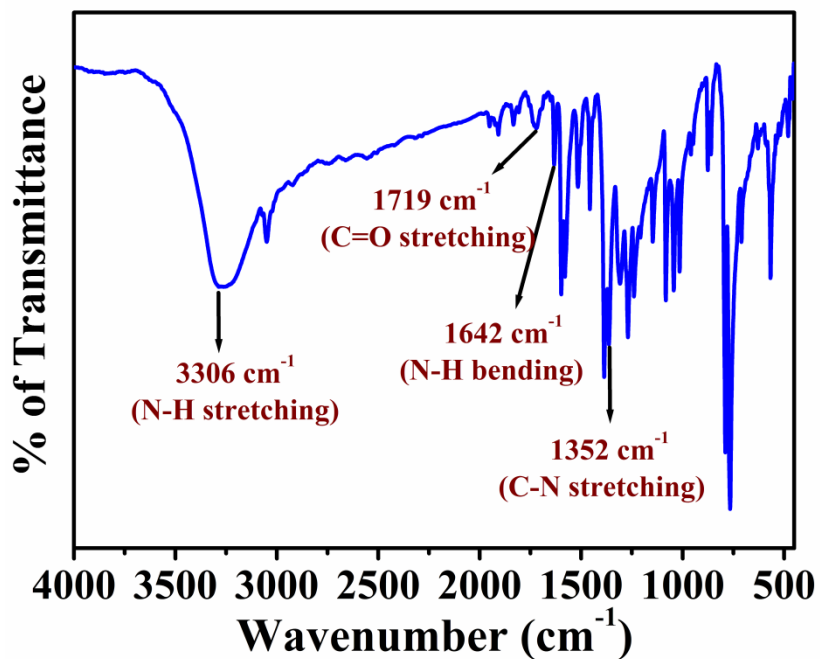

### Octan-3-yl carbamate

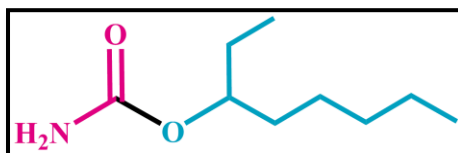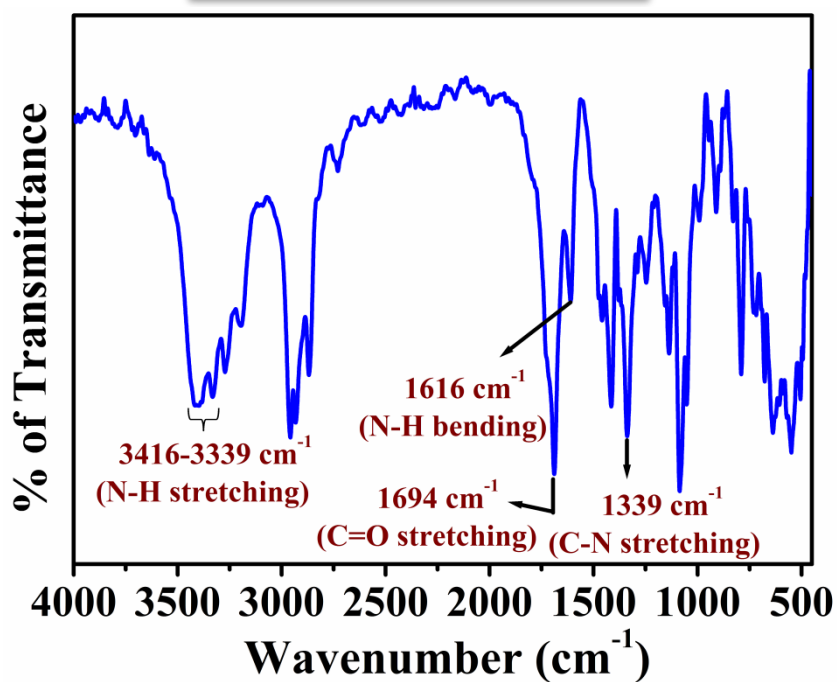

### 3-bromopropyl carbamate

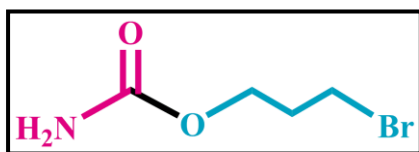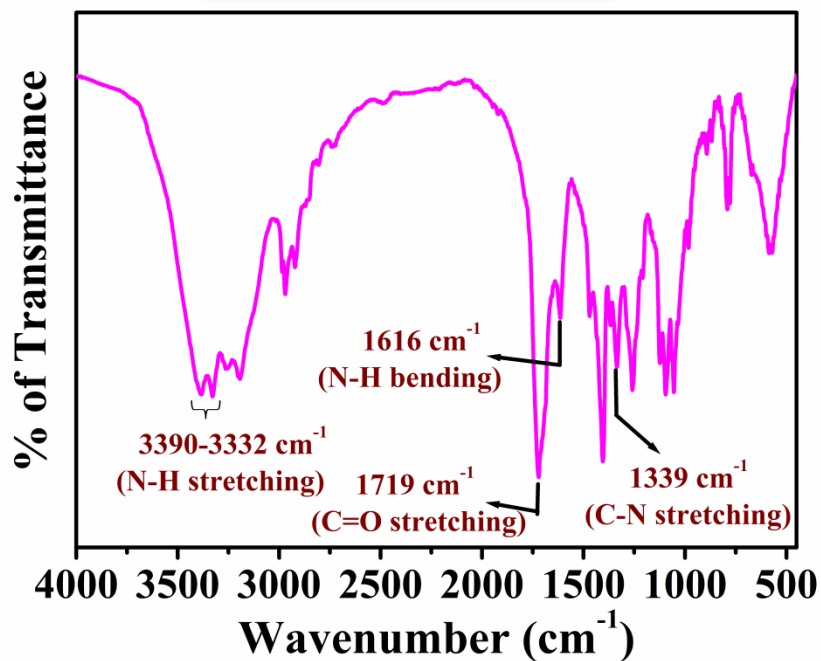

### Benzyl carbamate

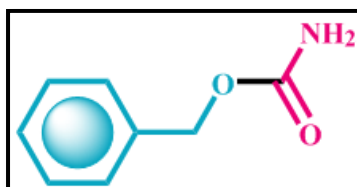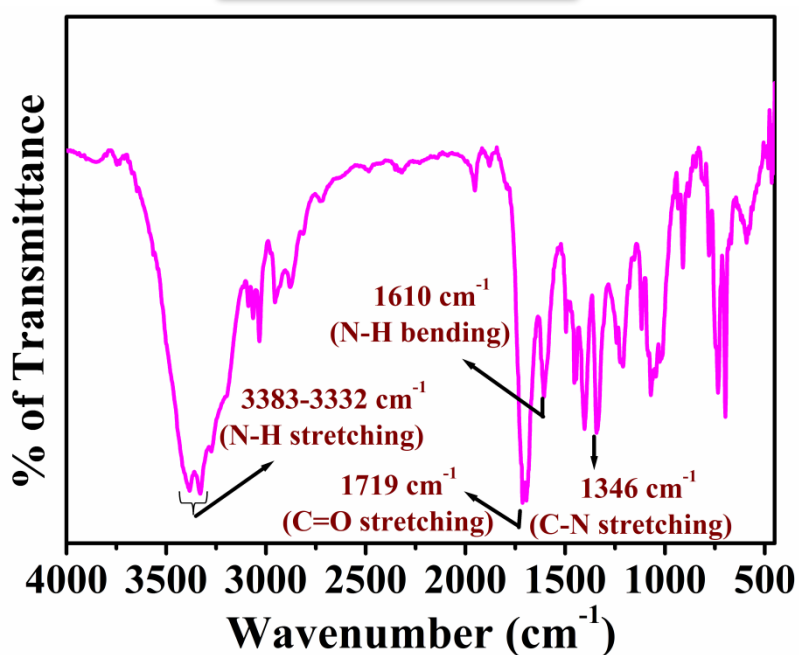

### 4-chlorobenzyl carbamate

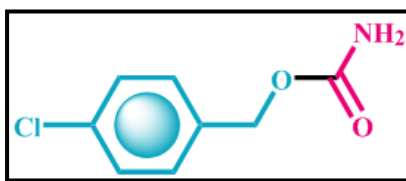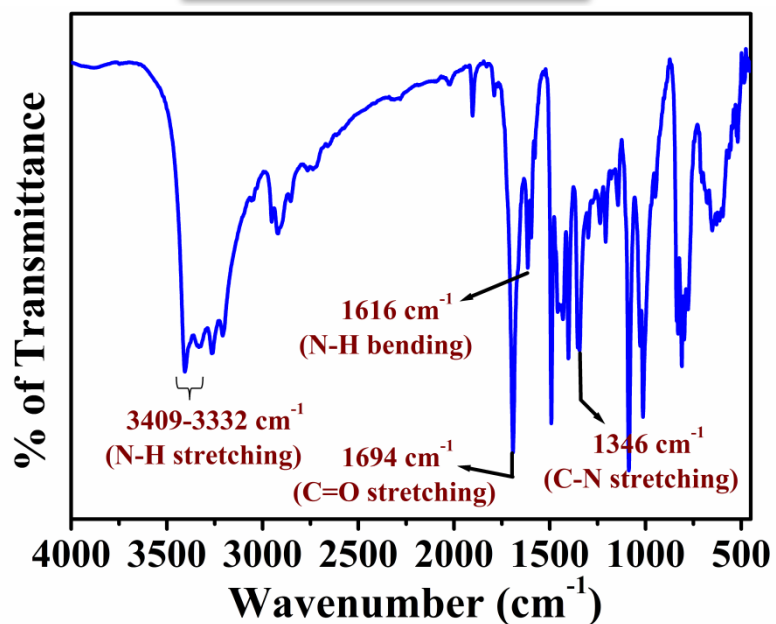

### 4-fluorobenzyl carbamate

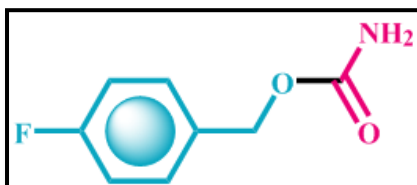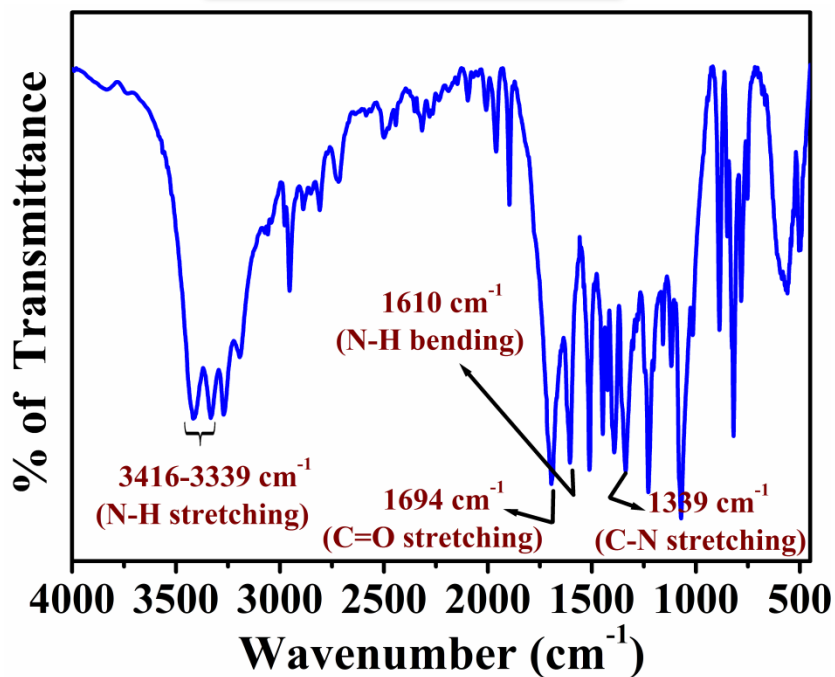

### 4-nitrobenzyl carbamate

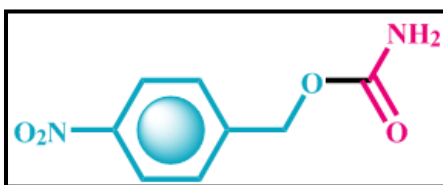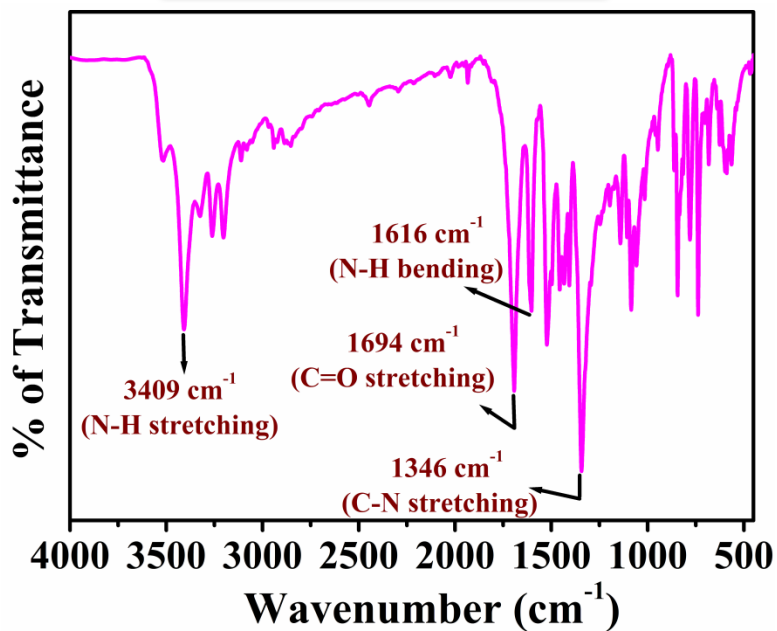

### 2-methoxyphenyl carbamate

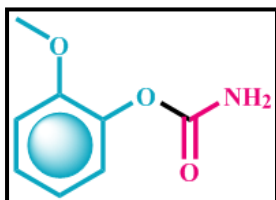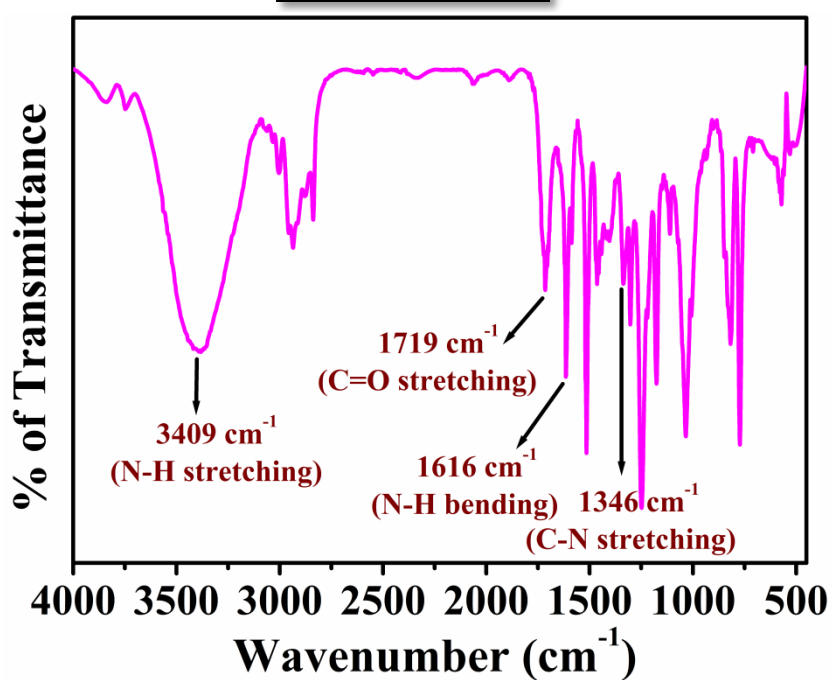



### Phenethyl carbamate

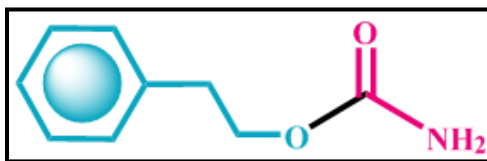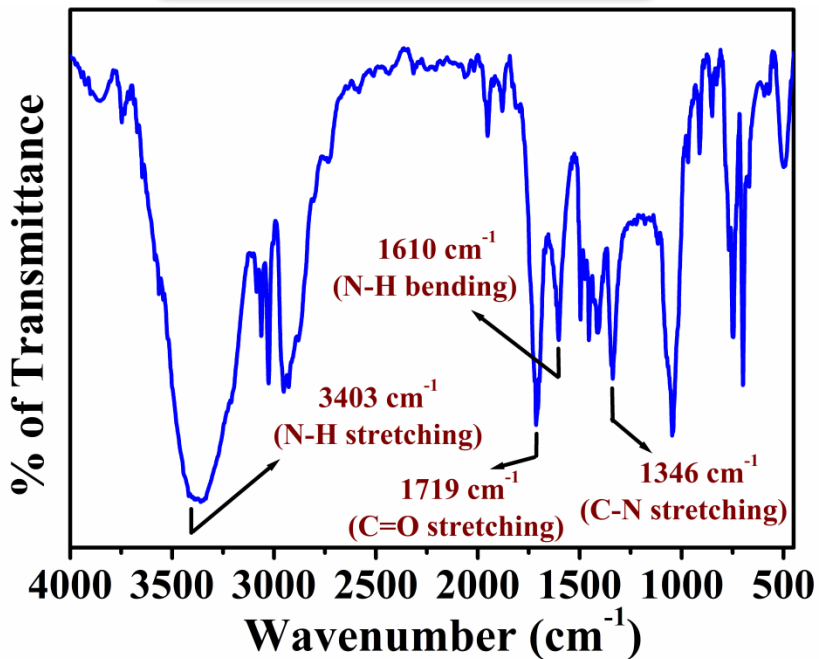

### Cyclohexyl carbamate

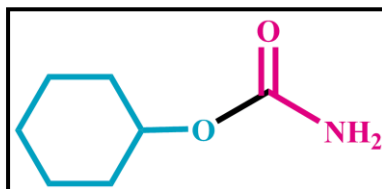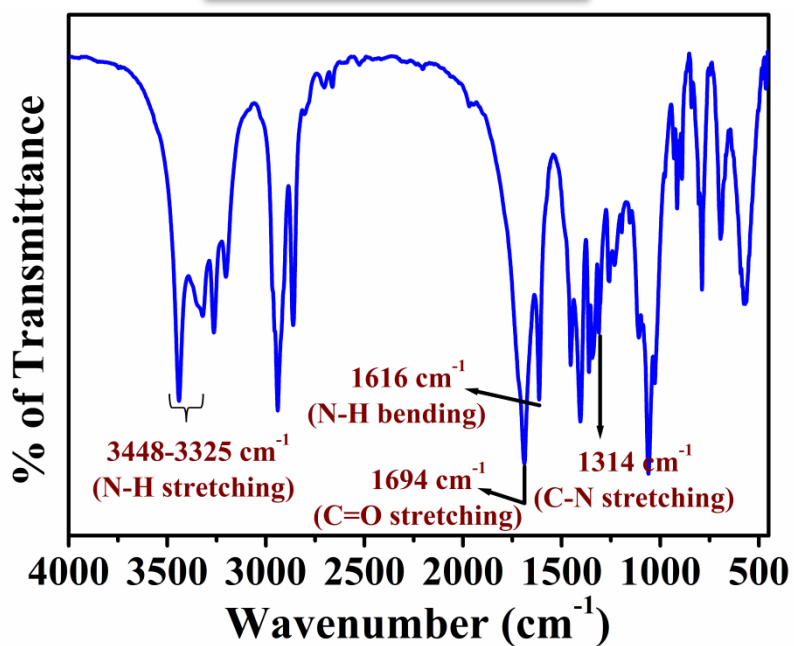

### Pyridin-4-yl carbamate

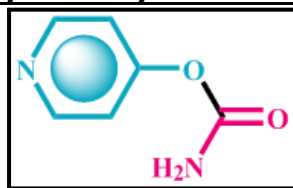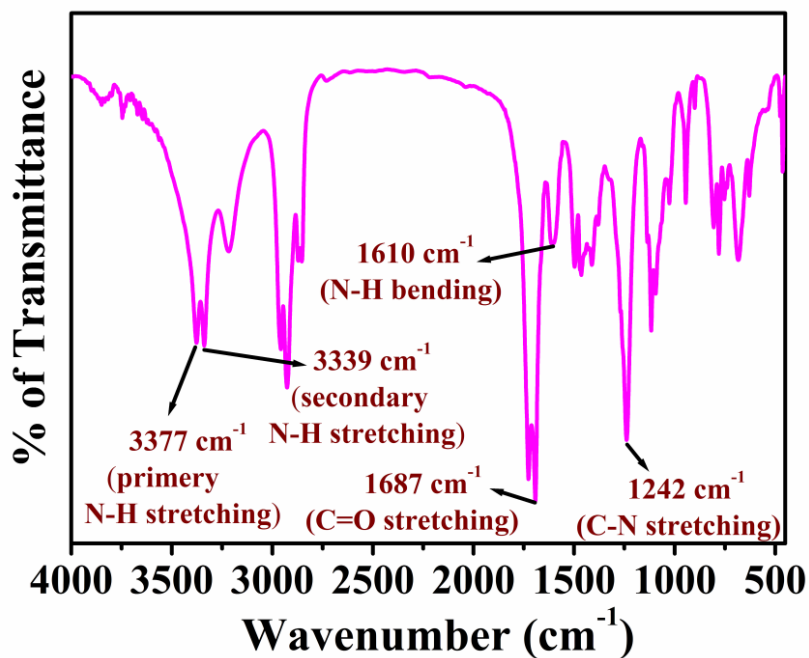

### Pyridin-2-yl carbamate

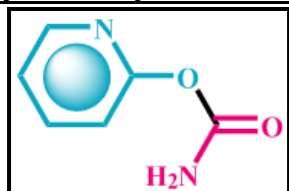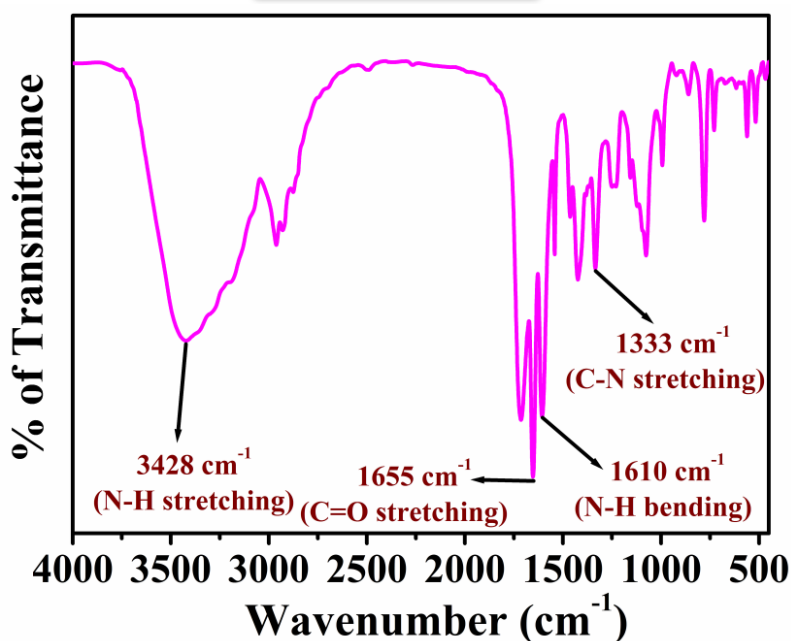

### Tert-butyl carbamate

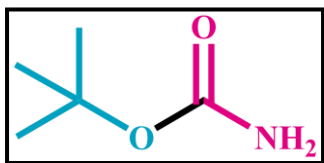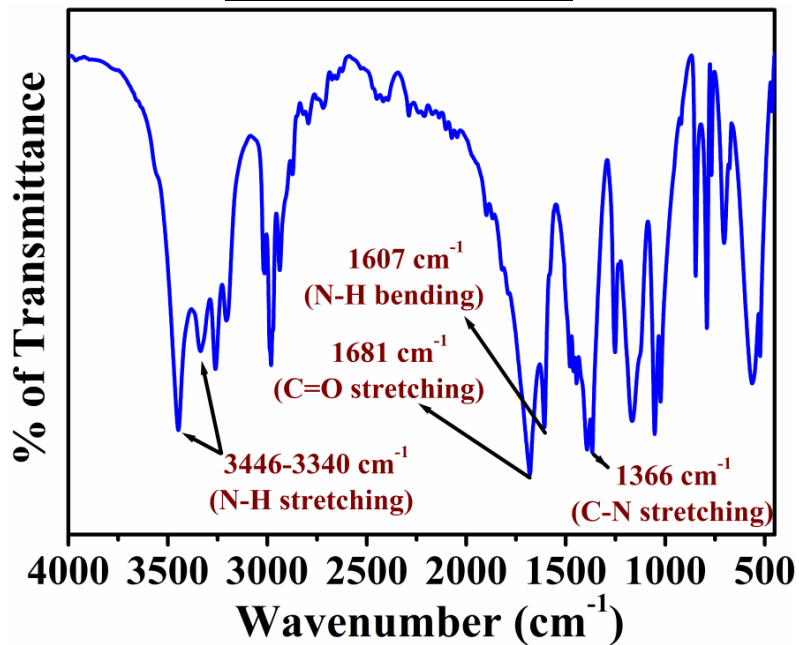

### FTIR spectra of N-substituted ureas

#### N-phenylurea

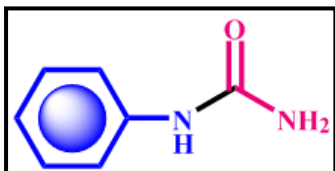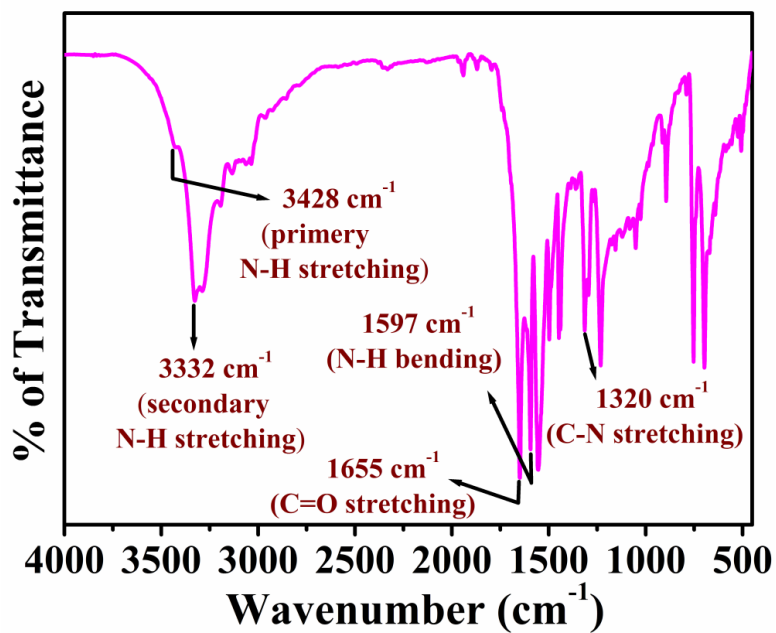

### Butylurea

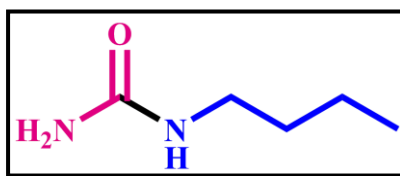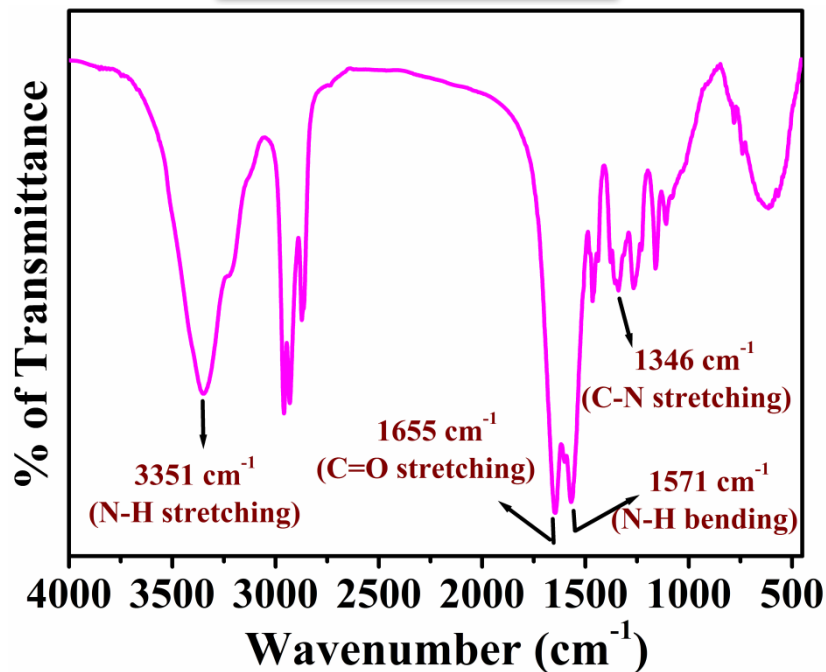

### Cyclohexylurea

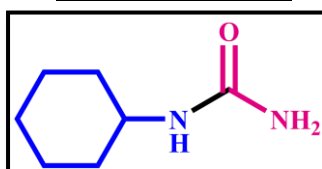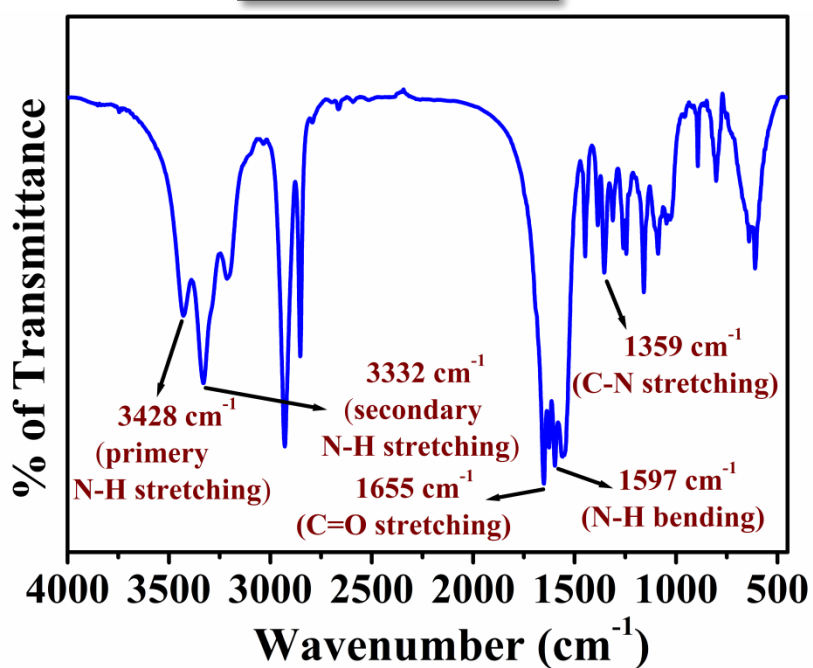

### Hexylurea

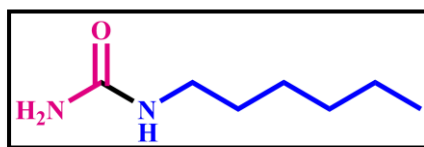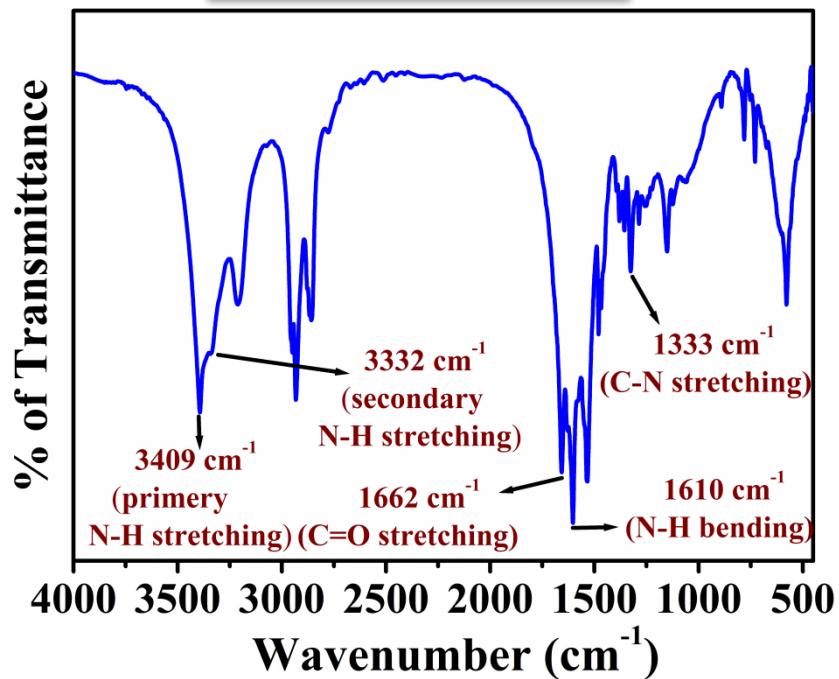

### Benzylurea

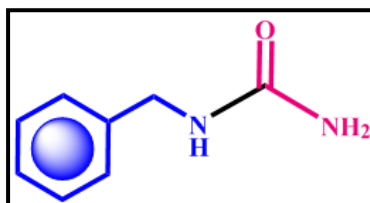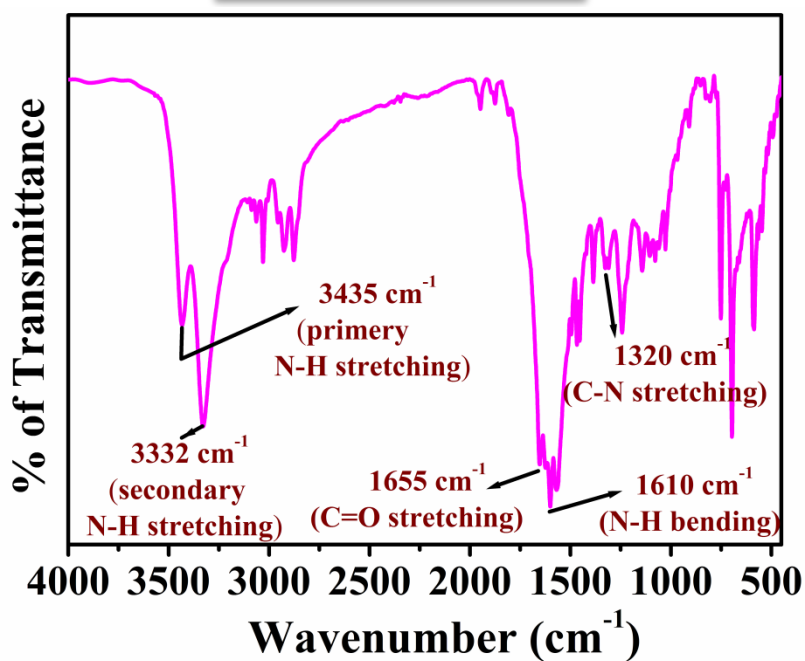

### 4-methoxyphenylurea

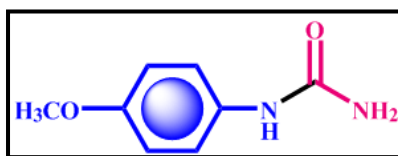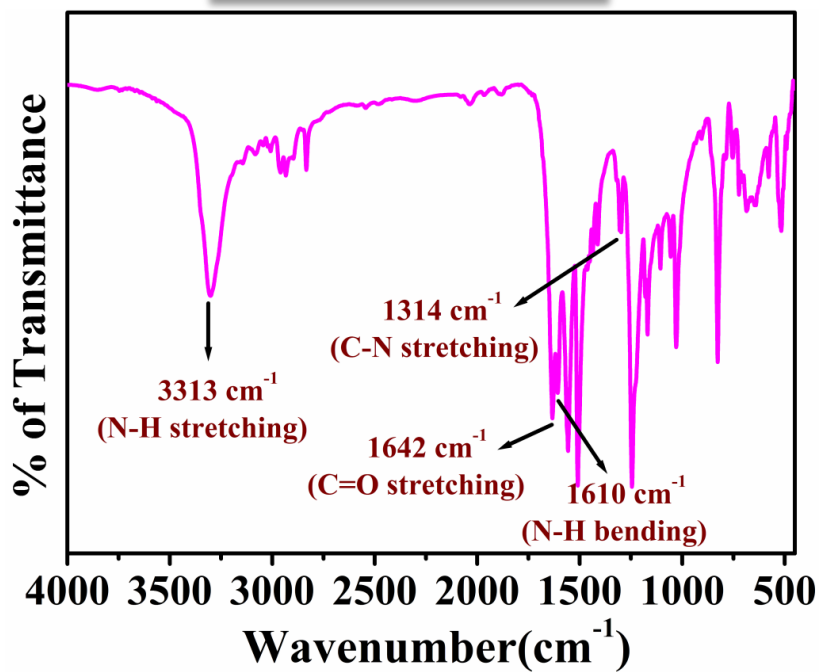

### Morpholine-4-carboxamide

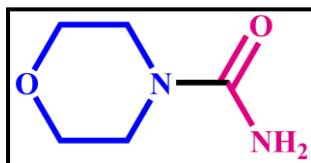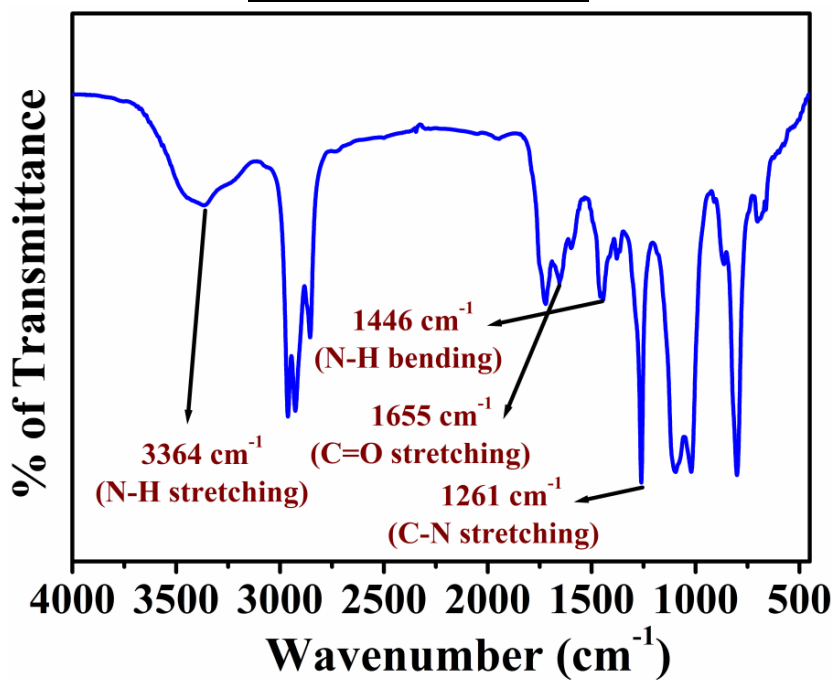

### 1-methyl-1-phenylurea

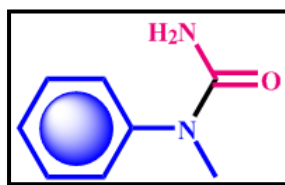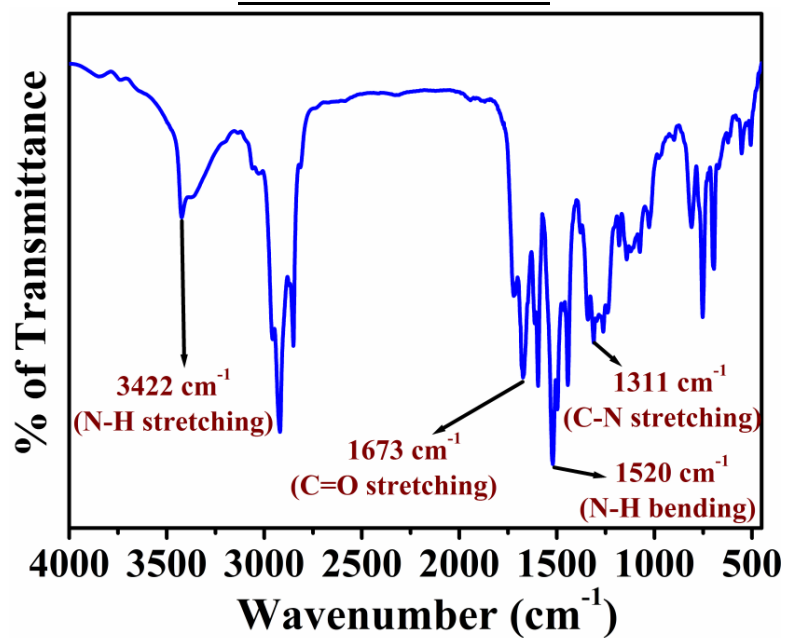

### Pyridyl urea

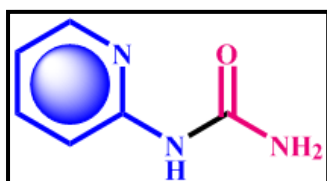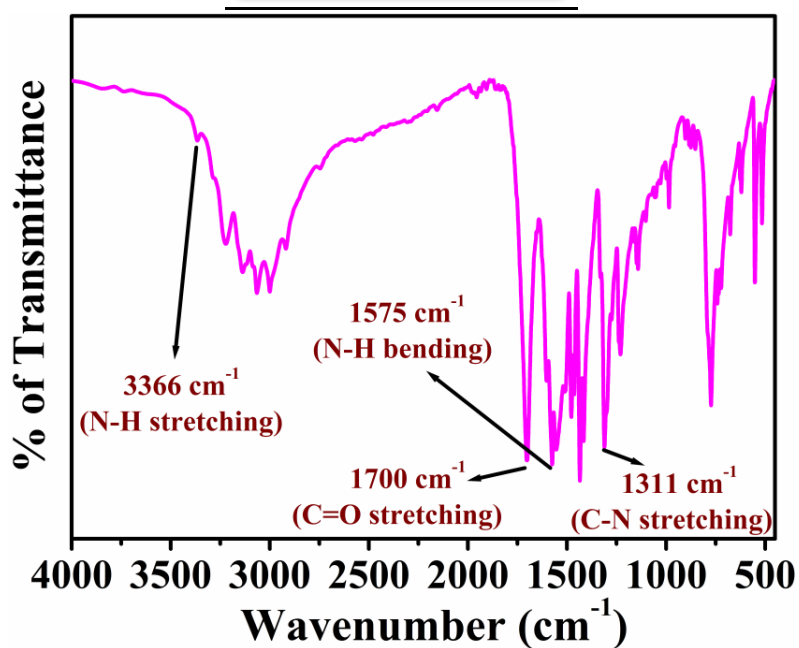

**(3-pyridyl)urea**

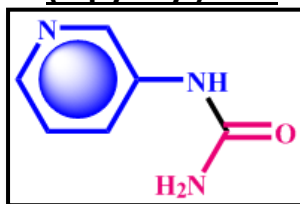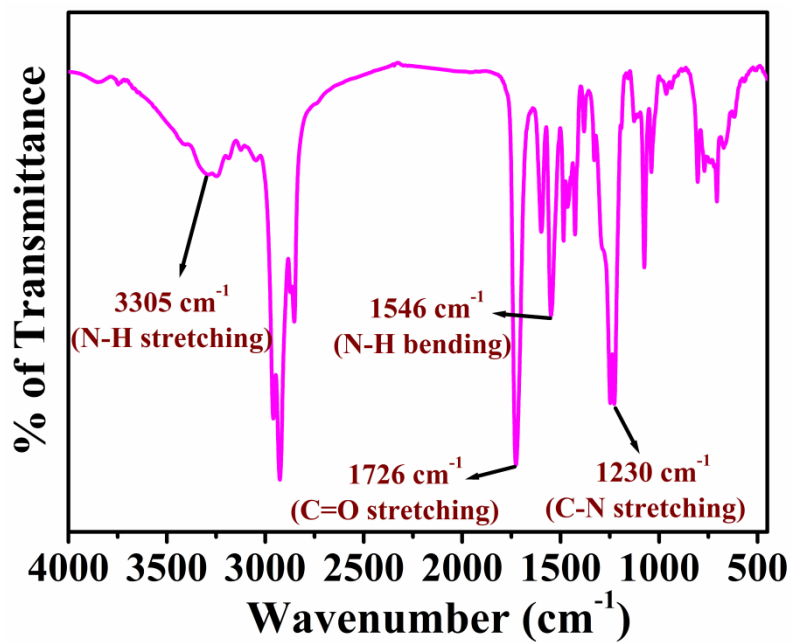

**Reference**

- [1] M. Wang, H. Wang, N. Zhao, W. Wei and Y. Sun, *Ind. Eng. Chem. Res.*, 2007, **46**, 2683.
